# Supplementary material for: Unravelling the clinicopathological and functional significance of replication protein A (RPA) heterotrimeric complex in breast cancers
Source: PubMed Central journal article supplement (PMC10063624; doi:10.1038/s41523-023-00524-3), 2023-03-30

**Supplementary Table 1:** Patient demographics in pure DCIS cohort (n=453).

| Parameter           | Groups                        | No  |
|---------------------|-------------------------------|-----|
| Age                 | <45 years                     | 57  |
|                     | >45 years                     | 396 |
| Presentation        | Screening                     | 217 |
|                     | symptomatic                   | 236 |
| Extent              | Localized                     | 305 |
|                     | Diffused                      | 67  |
| Size                | ≤20mm                         | 195 |
|                     | >20mm                         | 255 |
| Grade               | Low                           | 60  |
|                     | Moderate                      | 117 |
|                     | High                          | 276 |
| Comedo/<br>Necrosis | No.                           | 154 |
|                     | Yes                           | 299 |
| DCIS type           | Pure DCIS                     | 453 |
|                     | DCIS + invasive               | 196 |
| LCIS                | No                            | 411 |
|                     | Yes                           | 42  |
| Paget's.            | No                            | 276 |
|                     | Yes                           | 21  |
| ER status           | Negative                      | 109 |
|                     | Positive                      | 308 |
| PR status           | Negative                      | 177 |
|                     | Positive                      | 246 |
| Treatment           | Mastectomy                    | 260 |
|                     | Breast conserving surgery +RT | 193 |
|                     | Breast conserving surgery     | 123 |

**Supplementary Table 2.** Patient demographics in invasive breast cancer cohort (n=4221)

| <b>Variable</b>                                                                                           | <b>Frequency (% of whole cohort)</b> |
|-----------------------------------------------------------------------------------------------------------|--------------------------------------|
| <b>Age (years)</b>                                                                                        |                                      |
| <50 years                                                                                                 | 1353 (32.1)                          |
| ≥ 50 years                                                                                                | 2868 (67.9)                          |
| <b>Menopausal Status</b>                                                                                  |                                      |
| Pre-Menopause                                                                                             | 1526 (36.2)                          |
| Post-menopause                                                                                            | 2695 (63.8)                          |
| <b>Tumour Size (cm) (N=4215)</b>                                                                          |                                      |
| <2                                                                                                        | 2474 (58.6)                          |
| ≥2                                                                                                        | 1741 (41.2)                          |
| <b>Tumour Grade</b>                                                                                       |                                      |
| 1                                                                                                         | 757 (17.9)                           |
| 2                                                                                                         | 1584 (37.5)                          |
| 3                                                                                                         | 1880 (44.5)                          |
| <b>Glandular/tubular differentiation</b>                                                                  |                                      |
| Grade 1: >75% of the tumour forms glands                                                                  | 325 (7.7)                            |
| Grade 2: 10-75% of the tumour forms glands                                                                | 1329 (31.5)                          |
| Grade 3: <10% of the tumour forms glands                                                                  | 2567 (60.8)                          |
| <b>Nuclear Pleomorphism</b>                                                                               |                                      |
| Grade 1: Uniform cells with small nuclei                                                                  | 148 (3.5)                            |
| Grade 2: large cells with open vesicular nuclei, visible nucleoli. Moderate variability in size and shape | 1516 (35.9)                          |
| Grade 3: Vesicular nuclei, prominent nucleoli. Marked variation in size and shape                         | 2557 (60.6)                          |
| <b>Mitotic count (per 10 high power fields)</b>                                                           |                                      |
| <10 mitoses                                                                                               | 1864 (44.2)                          |
| 8-15 mitoses                                                                                              | 816 (19.3)                           |
| >16 mitoses                                                                                               | 1541 (36.5)                          |
| <b>Histological Tumour Type</b>                                                                           |                                      |
| No Special Type (NST)                                                                                     | 2591 (61.4)                          |
| Invasive Lobular Carcinoma                                                                                | 427 (10.1)                           |
| Metaplastic Carcinoma                                                                                     | 15 (0.4)                             |
| Pure Special Tumour Type (Tubular, Mucinous, Papillary, Micropapillary, Cribriform, ACC)                  | 249 (5.9)                            |
| Mixed NST and other tumour types                                                                          | 939 (22.2)                           |
| <b>Lymphovascular invasion</b>                                                                            |                                      |
| Absent                                                                                                    | 3000 (71.1)                          |
| Present                                                                                                   | 1221 (28.9)                          |
| <b>Lymph node status (N=4220)</b>                                                                         |                                      |
| Negative                                                                                                  | 2697 (63.9)                          |
| Positive                                                                                                  | 1523 (36.1)                          |
| <b>Nottingham Prognostic Index (N=4214)</b>                                                               |                                      |

|                                              |             |
|----------------------------------------------|-------------|
| Good                                         | 1522 (36.1) |
| Moderate                                     | 2079 (49.3) |
| Poor                                         | 613 (14.5)  |
| <b>Cancer stage (N=4220)</b>                 |             |
| Lymph node stage 1                           | 2697 (63.9) |
| Lymph node stage 2                           | 1157 (27.4) |
| Lymph node stage 3                           | 366 (8.7)   |
| <b>Oestrogen Receptor Status (N=4105)</b>    |             |
| Negative                                     | 961 (22.8)  |
| Positive                                     | 3144 (74.5) |
| <b>Progesterone Receptor Status (N=3833)</b> |             |
| Negative                                     | 1565 (37.1) |
| Positive                                     | 2268 (53.7) |
| <b>HER2 Status (N=3852)</b>                  |             |
| Negative                                     | 3376 (80.0) |
| Positive                                     | 476 (11.3)  |
| <b>Molecular Class (N=3281)</b>              |             |
| Luminal A                                    | 1317 (31.2) |
| Luminal B                                    | 1142 (27.1) |
| HER2 Enriched                                | 208 (4.9)   |
| TNBC                                         | 614 (14.5)  |
| <b>Triple negative (N=3966)</b>              |             |
| Non-triple negative                          | 3352 (79.4) |
| Triple negative                              | 614 (14.5)  |
| <b>Surgery (N=4221)</b>                      |             |
| WLE                                          | 2062(48.9)  |
| Mastectomy                                   | 2159(51.1)  |
| <b>Adjuvant Chemotherapy (N=4218)</b>        |             |
| No                                           | 3167(75)    |
| Yes                                          | 1051(24.9)  |
| <b>Adjuvant Radiotherapy (N=4173)</b>        |             |
| No                                           | 1522(36.1)  |
| Yes                                          | 2651(62.8)  |
| <b>Adjuvant Endocrine therapy (N=4173)</b>   |             |
| No                                           | 2108(49.9)  |
| Yes                                          | 2065(48.9)  |

**Supplementary Table 3.** Antigens, primary antibodies, clone, source, optimal dilution and scoring system used for each immunohistochemical marker.

| <i>Antigen</i> | <i>Antibody</i>             | <i>Clone</i> | <i>Source</i>     | <i>Antigen Retrieval</i> | <i>Dilution / Incubation Time</i> | <i>Distribution</i> | <i>Scoring system</i> | <i>Cut-offs</i>                                                 |
|----------------|-----------------------------|--------------|-------------------|--------------------------|-----------------------------------|---------------------|-----------------------|-----------------------------------------------------------------|
| <b>RPA1</b>    | Rabbit Anti-RPA70           | ab79398      | Abcam             | Citrate pH6              | 1:100 , 1h room temperature       | Nuclear             | H-score               | 100                                                             |
| <b>RPA2</b>    | Mouse Anti-RPA32            | ab2175       | Abcam             | Citrate pH6              | 1:100 , 1h room temperature       | Nuclear             | H-score               | 70                                                              |
| <b>RPA3</b>    | Rabbit Anti-RPA14           | ab97436      | Abcam             | Citrate pH6              | 1:50, 1h room temperature         | Nuclear cytoplasmic | H-score               | Nuclear 50- Cyto 40                                             |
| <b>MRE11</b>   | Mouse MAb Anti-MRE11        | ab214        | Abcam             | Citrate pH6              | 1:800<br>18hours                  | Nuclear cytoplasmic | H-score<br>H-score    | Low nuclear, Median H-score <90<br>Low cyto, Median H-score <10 |
| <b>RAD50</b>   | Mouse MAb Anti-RAD50        | ab89         | Abcam             | Citrate pH6              | 1:100<br>18hours                  | Nuclear             | H-score               | Low nuclear, Median H-score <100                                |
| <b>NBS1</b>    | Rabbit Anti-NBS1            | N3162        | Sigma             | Citrate pH6              | 1:100<br>18hours                  | Nuclear cytoplasmic | H-score<br>H-score    | Low nuclear, Median H-score 590<br>Low cyto, Median H-score <70 |
| <b>BRCA1</b>   | BRCA1                       | MS110        | Calbiochem        | Citrate pH6              | 1:100<br>60 min                   | Nuclear             | % of positive cells   | <25% (negative)                                                 |
| <b>ATM</b>     | Rabbit MAb anti-ATM         | Y170         | Abcam             | Citrate pH6              | 1:100<br>18 hours                 | Nuclear             | % of positive cells   | <25% (negative)                                                 |
| <b>XRCC1</b>   | Mouse MAb Anti-XRCC1        | 33-2-5       | Thermo-scientific | Citrate pH6              | 1:200<br>20 min                   | Nuclear             | % of positive cells   | ≥10% (positive)                                                 |
| <b>Pol β</b>   | Rabbit anti-polβ            | Ab26343      | Abcam             | Citrate pH6              | 1:200<br>60 min                   | Nuclear             | H- Score              | ≥100 (Median H-score, positive)                                 |
| <b>BLM</b>     | Rabbit anti BLM             | Polyclonal   | Novus-Biologicals | Citrate pH6              | 1:100<br>18 Hours                 | Nuclear             | H- Score              | ≥50 (Median H-score, positive)                                  |
| <b>RECQL4</b>  | Rabbit Anti RECQL4          | Polyclonal   | Novus Biologicals | Citrate pH6              | 1:1000<br>60 min                  | Nuclear             | H-score               | Nuclear ≥215 (Median H-score High)                              |
| <b>CHK2</b>    | Rabbit Anti CHK2            | Polyclonal   | Abcam             | Citrate pH6              | 1:100<br>60 min                   | Nuclear             | H- Score              | ≥100 (Median H-score, positive)                                 |
| <b>PARP1</b>   | Mouse MAb Anti-PARP1        | 7D3-6        | BD pharmingen     | Citrate pH6              | 1:1000                            | Nuclear             | % of positive cells   | ≥10% (positive)                                                 |
| <b>PR</b>      | Mouse MAb anti-PR           | PgR636       | Dako-Cytomation   | Citrate pH6              | 1:125<br>30 min                   | Nuclear             | % positive cells      | ≥1% positive                                                    |
| <b>HER2</b>    | Rabbit antihuman c-erbB2    | Polyclonal   | Dako-Cytomation   | None                     | 1:400<br>60 min                   | Membrane            | See text              | See text                                                        |
| <b>APE1</b>    | Rabbit polyclonal anti-APE1 | NB100-101    | Novus Biologicals | Citrate pH6              | 1:500<br>60 min                   | Nuclear             | H-score               | ≥100 (positive)                                                 |

|               |                                |                      |                               |                |                    |                        |                     |                   |
|---------------|--------------------------------|----------------------|-------------------------------|----------------|--------------------|------------------------|---------------------|-------------------|
| <b>SMUG1</b>  | Goat anti- SMUG1               | Polyclonal           | Acris Antibody GmbH           | Citrate pH6    | 1/200<br>15 min    | Nuclear                | H-score             | > 35 (positive)   |
| <b>pChk1</b>  | Rabbit anti-pChk1              | Ab58567              | Abcam                         | Citrate pH6    | 1:140<br>60 min    | Nuclear                | H-score             | ≥50 (High)        |
| <b>ATR</b>    | Mouse MAb Anti-ATR             | 1E9                  | Novus Biologicals             | Citrate pH6    | 1:20<br>18 hours   | Nuclear                | H-score             | ≥60 (High)        |
| <b>BRCA2</b>  | Anti-BRCA2                     | Polyclonal           | Sigma                         | Citrate pH6    | 1:200<br>Overnight | Nuclear                | H-score             | >10               |
| <b>RECQ5</b>  | Rabbit anti RecqL5             | Polyclonal           | SigmaAldrich                  | Citrate pH6    | 1:100<br>60 min    | Nuclear                | H - Score           | ≥10 (positive)    |
| <b>RECQL1</b> | Rabbit anti-RECQL1             | Polyclonal           | Bethyl Laboratories           | citrate pH 6.0 | 1:1,000<br>60 min  | Nuclear                | H-score             | =226              |
| <b>ERCC1</b>  | Mouse anti-ERCC1               | 4F9                  | Dako Ltd                      | citrate pH 6.0 | 1:150<br>30 min    | Nuclear                | H-score             | ≥ 130             |
| <b>CHK1</b>   | Rabbit anti-CHK1               | Polyclonal           | Abcam                         | citrate pH 6.0 | 1:150<br>60 min    | Nuclear                | H-score             | >30               |
| <b>RAD51</b>  | Mouse anti-RAD50               | Polyclonal           | Abcam                         | citrate pH 6.0 | 1:70<br>20 min     | Nuclear                | H-score             | Nuclear ≥8 (High) |
| <b>γH2AX</b>  | Ab22551(Phospho S139)<br>Mouse | Monoclonal           | Abcam                         | citrate pH 6.0 | 1:600<br>1h        | Nuclear                | H-score             | ≥ 40              |
| <b>PIK3CA</b> | Rabbit anti-PIK3CA antibody    | HPA009985            | SigmaAldrich                  | citrate pH 6.0 | 1:50<br>1h         | cytoplasmic            | H-score             | 30 and 100        |
| <b>FOXA1</b>  | Anti-FOXA1 antibody            | ab40868              | Abcam                         | citrate pH 6.0 | 1:2,000            |                        | H-score             | 100               |
| <b>FOXO3A</b> | Forkhead box O3a               | Polyclonal<br>(9467) | Cell Signalling<br>Technology | citrate pH 6.0 | 1:50<br>1h         | Nuclear<br>cytoplasmic | H-score             | ≥10               |
| <b>P53</b>    | Anti-P53 antibody              | D07                  | Novocastra                    | citrate pH 6.0 | 1:50<br>1h         | Nuclear                | % of positive cells | >10% (negative)   |
| <b>PIK3CA</b> | Rabbit anti-PIK3CA antibody    | HPA009985            | SigmaAldrich                  | citrate pH 6.0 | 1:50<br>1h         | cytoplasmic            | H-score             | 30 and 100        |

**Supplementary Table 4:** RPA1 protein expression and clinicopathological characteristics in DCIS.

| <b>RPA1 Expression</b>              |                  |                   |                |
|-------------------------------------|------------------|-------------------|----------------|
| <b>Variable</b>                     | <b>Low N (%)</b> | <b>High N (%)</b> | <b>P value</b> |
| <b>DCIS Size (cm)</b>               |                  |                   | 0.420          |
| ≤2                                  | 97(52.7)         | 87 (47.3)         |                |
| >2                                  | 122(48.8)        | 128(51.2)         |                |
| <b>Nuclear Grade</b>                |                  |                   | <b>0.010</b>   |
| Low                                 | 22(38.6)         | 35(61.4)          |                |
| Moderate                            | 50(42.7)         | 67(57.3)          |                |
| High                                | 148(56.1)        | 116(43.9)         |                |
| <b>Comedo Necrosis</b>              |                  |                   | 0.094          |
| No                                  | 68 (44.7)        | 84 (55.3)         |                |
| Yes                                 | 152 (53.1)       | 134 (46.9)        |                |
| <b>Oestrogen Receptor Status</b>    |                  |                   | <b>0.006</b>   |
| Negative                            | 61(62.2)         | 37(37.8)          |                |
| Positive                            | 128(46.2)        | 149(53.8)         |                |
| <b>Progesterone Receptor Status</b> |                  |                   | <b>0.001</b>   |
| Negative                            | 97(59.9)         | 65(40.1)          |                |
| Positive                            | 92(42.2)         | 126(57.8)         |                |
| <b>HER2 Status</b>                  |                  |                   | 0.075          |
| Negative                            | 150(48.2)        | 161(51.8)         |                |
| Positive                            | 53(58.9)         | 37(41.1)          |                |
| <b>Molecular Class</b>              |                  |                   | 0.074          |
| Luminal A                           | 82(46.9)         | 93(53.1)          |                |
| Luminal B                           | 27(43.5)         | 35(56.5)          |                |
| HER2 Enriched                       | 31(63.3)         | 18(36.7)          |                |
| TNBC                                | 27(60)           | 18(40)            |                |

Association with clinical and pathological parameters using categorised data was examined using Chi-squared test. All tests were 2-tailed.

**Supplementary Table 5:** RPA1 expression and clinicopathological features in invasive breast cancer.

| <b>RPA1 Expression</b>                                                                                    |                  |                   |                               |
|-----------------------------------------------------------------------------------------------------------|------------------|-------------------|-------------------------------|
| <b>Variable</b>                                                                                           | <b>Low N (%)</b> | <b>High N (%)</b> | <b>P value</b>                |
| <b>Tumour Size (cm)</b>                                                                                   |                  |                   | <b>1.37 x10<sup>-7</sup></b>  |
| <2                                                                                                        | 581 (50.0)       | 582 (50.0)        |                               |
| ≥2                                                                                                        | 566 (61.5)       | 354 (38.5)        |                               |
| <b>Tumour Grade</b>                                                                                       |                  |                   | <b>2.23 x10<sup>-12</sup></b> |
| 1                                                                                                         | 118 (40.0)       | 177 (60.0)        |                               |
| 2                                                                                                         | 376 (50.9)       | 362 (49.1)        |                               |
| 3                                                                                                         | 653 (62.2)       | 397 (37.8)        |                               |
| <b>Glandular/tubular differentiation</b>                                                                  |                  |                   | <b>6.10 x 10<sup>-7</sup></b> |
| Grade 1: >75% of the tumour forms glands                                                                  | 46 (39.3)        | 71 (60.7)         |                               |
| Grade 2: 10-75% of the tumour forms glands                                                                | 319 (49.5)       | 325 (50.5)        |                               |
| Grade 3: <10% of the tumour forms glands                                                                  | 782 (59.2)       | 540 (40.8)        |                               |
| <b>Nuclear Pleomorphism</b>                                                                               |                  |                   | <b>8.56 x10<sup>-7</sup></b>  |
| Grade 1: Uniform cells with small nuclei                                                                  | 11 (27.5)        | 29 (72.5)         |                               |
| Grade 2: large cells with open vesicular nuclei, visible nucleoli. Moderate variability in size and shape | 316 (49.2)       | 326 (50.8)        |                               |
| Grade 3: Vesicular nuclei, prominent nucleoli. Marked variation in size and shape                         | 820 (58.5)       | 581 (41.5)        |                               |
| <b>Mitotic count (per 10 high power fields)</b>                                                           |                  |                   | <b>1.51 x10<sup>-10</sup></b> |
| <10 mitoses                                                                                               | 382 (46.3)       | 443 (53.7)        |                               |
| 8-15 mitoses                                                                                              | 227 (57.3)       | 169 (42.7)        |                               |
| >16 mitoses                                                                                               | 538 (62.4)       | 324 (37.6)        |                               |
| <b>Histological Tumour Type</b>                                                                           |                  |                   | <b>3.00 x10<sup>-6</sup></b>  |
| No Special Type (NST)                                                                                     | 816 (58.8)       | 572 (41.2)        |                               |
| Invasive Lobular Carcinoma                                                                                | 88 (53.3)        | 77 (46.7)         |                               |
| Metaplastic Carcinoma                                                                                     | 6 (85.7)         | 1 (14.3)          |                               |
| Pure Special Tumour Type (Tubular, Mucinous, Papillary, Micropapillary, Cribriform, ACC)                  | 31 (41.3)        | 44 (58.7)         |                               |
| Mixed NST and other tumour types                                                                          | 206 (46.0)       | 242 (54.0)        |                               |
| <b>Lymphovascular invasion</b>                                                                            |                  |                   | <b>1.83 x10<sup>-4</sup></b>  |
| Absent                                                                                                    | 735 (52.2)       | 672 (47.8)        |                               |
| Present                                                                                                   | 412 (60.9)       | 264 (39.1)        |                               |
| <b>Lymph node status</b>                                                                                  |                  |                   | <b>0.001</b>                  |
| Negative                                                                                                  | 667 (52.1)       | 614 (47.9)        |                               |
| Positive                                                                                                  | 480 (59.9)       | 322 (40.1)        |                               |
| <b>Nottingham Prognostic Index</b>                                                                        |                  |                   | <b>7.68 x10<sup>-11</sup></b> |
| Good                                                                                                      | 285 (44.5)       | 355 (55.5)        |                               |
| Moderate                                                                                                  | 637 (58.1)       | 460 (41.9)        |                               |
| Poor                                                                                                      | 225(65)          | 221(35)           |                               |
| <b>Oestrogen Receptor Status</b>                                                                          |                  |                   | <b>4.01 x10<sup>-8</sup></b>  |

|                                     |            |            |                              |
|-------------------------------------|------------|------------|------------------------------|
| Negative                            | 334 (65.6) | 175 (34.4) |                              |
| Positive                            | 811 (51.7) | 758 (48.3) |                              |
| <b>Progesterone Receptor Status</b> |            |            | <b>9.18 x10<sup>-8</sup></b> |
| Negative                            | 539 (61.8) | 333 (38.2) |                              |
| Positive                            | 593 (50.0) | 594 (50.0) |                              |
| <b>HER2 Status</b>                  |            |            | <b>0.05</b>                  |
| Negative                            | 952 (53.6) | 825 (46.4) |                              |
| Positive                            | 170 (62.7) | 101 (37.3) |                              |
| <b>Ki67 Index</b>                   |            |            | <b>2.10 x10<sup>-5</sup></b> |
| Low                                 | 353 (48.5) | 375 (51.5) |                              |
| High                                | 531 (59.1) | 368 (40.9) |                              |
| <b>Molecular Class</b>              |            |            | <b>4.77 x10<sup>-9</sup></b> |
| Luminal A                           | 301 (46.4) | 345 (53.4) |                              |
| HER2 Enriched                       | 84 (70.6)  | 35 (29.4)  |                              |
| TNBC                                | 229 (63.8) | 130 (36.2) |                              |
| Luminal B                           | 379 (56.1) | 297 (43.9) |                              |
| <b>Triple negative</b>              |            |            | <b>1.97 x10<sup>-4</sup></b> |
| Non-triple negative                 | 895 (53.0) | 793 (47.0) |                              |
| Triple negative                     | 229 (68.3) | 130 (36.2) |                              |

Association with clinical and pathological parameters using categorised data was examined using Chi-squared test. All tests were 2-tailed



**Supplementary Table 6:** RPA2 protein expression and clinicopathological characteristics in pure DCIS.

| <b>Variable</b>                     | <b>Low N (%)</b> | <b>High N (%)</b> | <b>P value</b> |
|-------------------------------------|------------------|-------------------|----------------|
| <b>DCIS Size (cm)</b>               |                  |                   | <b>0.520</b>   |
| ≤2                                  | 61(48)           | 66(52)            |                |
| >2                                  | 92(47.7)         | 101(52.3)         |                |
| <b>Nuclear Grade</b>                |                  |                   | <b>0.007</b>   |
| Low                                 | 12(36.4)         | 21(63.6)          |                |
| Moderate                            | 32(36.4)         | 56(63.6)          |                |
| High                                | 109(54.5)        | 91(45.5)          |                |
| <b>Comedo Necrosis</b>              |                  |                   | <b>0.009</b>   |
| No                                  | 39(37.1)         | 66(62.9)          |                |
| Yes                                 | 114(52.8)        | 102(47.2)         |                |
| <b>Oestrogen Receptor Status</b>    |                  |                   | <b>0.001</b>   |
| Negative                            | 46(66.7)         | 23(33.3)          |                |
| Positive                            | 91(42.9)         | 121(57.1)         |                |
| <b>Progesterone Receptor Status</b> |                  |                   | <b>0.003</b>   |
| Negative                            | 71(58.7)         | 50(41.3)          |                |
| Positive                            | 68(41)           | 98(59)            |                |
| <b>HER2 Status</b>                  |                  |                   | 0.294          |
| Negative                            | 108(47.2)        | 121(52.8)         |                |
| Positive                            | 37(54.4)         | 31(45.6)          |                |
| <b>Molecular Class</b>              |                  |                   | <b>0.007</b>   |
| Luminal A                           | 55(43.7)         | 71(56.3)          |                |
| Luminal B                           | 23(45.1)         | 28(54.9)          |                |
| HER2 Enriched                       | 21(58.3)         | 15(41.7)          |                |
| TNBC                                | 23(76.7)         | 7(23.3)           |                |

Association with clinical and pathological parameters using categorised data was examined using Chi-squared test. All tests were 2-tailed

**Supplementary Table 7: RPA2 expression and clinicopathological features in invasive breast cancer.**

| <b>Variable</b>                                                                                          | <b>Low N (%)</b> | <b>High N (%)</b> | <b>P value</b>               |
|----------------------------------------------------------------------------------------------------------|------------------|-------------------|------------------------------|
| <b>Tumour Size</b>                                                                                       |                  |                   | <b>0.001</b>                 |
| <2cm                                                                                                     | 403 (50.4)       | 397 (49.6)        |                              |
| ≥2cm                                                                                                     | 379 (58.9)       | 265 (41.1)        |                              |
| <b>Tumour Grade</b>                                                                                      |                  |                   | <b>2.94 x10<sup>-7</sup></b> |
| 1                                                                                                        | 43 (34.1)        | 83 (65.9)         |                              |
| 2                                                                                                        | 273 (51.4)       | 258 (48.6)        |                              |
| 3                                                                                                        | 466 (59.2)       | 321 (40.8)        |                              |
| <b>Glandular/tubular differentiation</b>                                                                 |                  |                   |                              |
| Grade 1: >75% of the tumour forms glands                                                                 | 18 (37.5)        | 30 (62.5)         | <b>0.012</b>                 |
| Grade 2: 10-75% of the tumour forms glands                                                               | 208 (51.0)       | 200 (49.0)        |                              |
| Grade 3: <10% of the tumour forms glands                                                                 | 556 (56.3)       | 432 (43.7)        |                              |
| <b>Nuclear Pleomorphism</b>                                                                              |                  |                   |                              |
| Grade 1: Uniform cells with small nuclei                                                                 | 5 (33.3)         | 10 (66.7)         | <b>1.10 x10<sup>-5</sup></b> |
| Grade 2: large cells with open vesicular nuclei, visible nucleol. Moderate variability in size and shape | 157 (44.1)       | 199 (55.9)        |                              |
| Grade 3: Vesicular nuclei, prominent nucleoli. Marked variation in size and shape                        | 620 (57.8)       | 453 (42.2)        |                              |
| <b>Mitotic count</b>                                                                                     |                  |                   | <b>2.00 x10<sup>-5</sup></b> |
| <10 mitoses per 10 high power fields                                                                     | 242 (46.4)       | 279 (53.6)        |                              |
| 8-15 mitoses per 10 high power fields                                                                    | 161 (54.9)       | 132 (45.1)        |                              |
| >16 mitoses per 10 high power fields                                                                     | 379 (60.2)       | 251 (39.8)        |                              |
| <b>Histological Tumour Type</b>                                                                          |                  |                   | 0.056                        |
| No Special Type (NST)                                                                                    | 577 (56.1)       | 451 (43.9)        |                              |
| Invasive Lobular Carcinoma                                                                               | 48 (46.2)        | 56 (53.8)         |                              |
| Metaplastic Carcinoma                                                                                    | 3 (100.0)        | 0 (0.0)           |                              |
| Pure Special Tumour Type (Tubular, Mucinous, Papillary, Micropapillary, Cribriform, ACC)                 | 13 (52.0)        | 12 (48.0)         |                              |
| Mixed NST and other tumour types                                                                         | 141 (49.6)       | 143 (50.4)        |                              |
| <b>Lymphovascular invasion</b>                                                                           |                  |                   | <b>3.80 x10<sup>-5</sup></b> |
| Absent                                                                                                   | 487 (50.4)       | 480 (49.6)        |                              |
| Present                                                                                                  | 295 (61.8)       | 182 (38.2)        |                              |
| <b>Lymph node status</b>                                                                                 |                  |                   | <b>0.001</b>                 |
| Negative                                                                                                 | 443 (50.7)       | 431 (49.3)        |                              |
| Positive                                                                                                 | 339 (59.5)       | 231 (40.5)        |                              |
| <b>Nottingham Prognostic Index</b>                                                                       |                  |                   | <b>4.00 x10<sup>-6</sup></b> |
| Good                                                                                                     | 172 (44.6)       | 214 (55.4)        |                              |
| Moderate                                                                                                 | 449 (55.7)       | 357 (44.3)        |                              |
| Poor                                                                                                     | 161 (63.9)       | 91 (36.1)         |                              |
| <b>ER Status</b>                                                                                         |                  |                   | 0.229                        |
| Negative                                                                                                 | 208 (56.8)       | 158 (43.2)        |                              |
| Positive                                                                                                 | 573 (53.2)       | 504 (46.8)        |                              |

|                        |            |            |              |
|------------------------|------------|------------|--------------|
| <b>PgR Status</b>      |            |            | 0.083        |
| Negative               | 352 (56.6) | 270 (43.4) |              |
| Positive               | 420 (52.0) | 388 (48.0) |              |
| <b>HER2 Status</b>     |            |            | 0.071        |
| Negative               | 653 (53.2) | 574 (46.8) |              |
| Positive               | 123 (60.0) | 82 (40.0)  |              |
| <b>Ki67 Index</b>      |            |            | <b>0.036</b> |
| Low                    | 226 (49.0) | 235 (51.0) |              |
| High                   | 372 (55.4) | 300 (44.6) |              |
| <b>Molecular Class</b> |            |            | 0.052        |
| Luminal A              | 197 (48.3) | 211 (51.7) |              |
| HER2 Enriched          | 52 (60.5)  | 34 (39.5)  |              |
| TNBC                   | 145 (55.8) | 115 (44.2) |              |
| Luminal B              | 292 (55.7) | 232 (44.3) |              |
| <b>Triple negative</b> |            |            | 0.553        |
| Non-triple negative    | 625 (53.7) | 538 (46.3) |              |
| Triple negative        | 145 (55.8) | 115 (44.2) |              |

Association with clinical and pathological parameters using categorised data was examined using Chi-squared test. All tests were 2-tailed

**Supplementary Table 8:** RPA3 protein expressions and clinicopathological characteristics in pure DCIS

| Variable                            | RPA3 nuclear expression |            |                 | RPA3 cytoplasm expression |            |                               |
|-------------------------------------|-------------------------|------------|-----------------|---------------------------|------------|-------------------------------|
|                                     | Low N (%)               | High N (%) | P value         | Low N (%)                 | High N (%) | P value                       |
| <b>DCIS Size (cm)</b>               |                         |            | <b>0.027</b>    |                           |            | 0.073                         |
| ≤2                                  | 50 (45.9)               | 59 (54.1)  |                 | 47 (43.1)                 | 62 (56.9)  |                               |
| >2                                  | 101 (59.4)              | 69 (40.6)  |                 | 92 (54.1)                 | 78 (45.9)  |                               |
| <b>Three Tier Grade</b>             |                         |            | <b>0.001</b>    |                           |            | <b>0.000037</b>               |
| Low                                 | 12 (35.3)               | 22(64.7)   |                 | 9 (26.5)                  | 25(73.5)   |                               |
| Moderate                            | 33 (43.4)               | 43 (56.6)  |                 | 28 (36.8)                 | 48(63.2)   |                               |
| High                                | 107 (62.9)              | 63 (37.1)  |                 | 103 (60.6)                | 67(39.4)   |                               |
| <b>Comedo Necrosis</b>              |                         |            | <b>0.021</b>    |                           |            | <b>0.001</b>                  |
| No                                  | 43(44.8)                | 53 (55.2)  |                 | 35(36.5)                  | 61(63.5)   |                               |
| Yes                                 | 109(59.2)               | 75 (40.8)  |                 | 105(57.1)                 | 79(42.9)   |                               |
| <b>Oestrogen Receptor Status</b>    |                         |            | <b>0.000079</b> |                           |            | <b>0.000040</b>               |
| Negative                            | 49 (75.4)               | 16 (24.6)  |                 | 46 (70.8)                 | 19 (29.2)  |                               |
| Positive                            | 86 (47)                 | 97 (53)    |                 | 76 (41.5)                 | 107 (58.5) |                               |
| <b>Progesterone Receptor Status</b> |                         |            | <b>0.000013</b> |                           |            | <b>5.102 x10<sup>-7</sup></b> |
| Negative                            | 72 (71.3)               | 29 (28.7)  |                 | 69 (68.3)                 | 32 (31.7)  |                               |
| Positive                            | 65 (43.3)               | 85(56.7)   |                 | 54(36)                    | 96 (64)    |                               |
| <b>HER2 Status</b>                  |                         |            | <b>0.001</b>    |                           |            | <b>0.000189</b>               |
| Negative                            | 96 (48.2)               | 103(51.8)  |                 | 84 (42.2)                 | 115 (57.8) |                               |
| Positive                            | 45(72.6)                | 17(27.4)   |                 | 43 (69.4)                 | 19 (30.6)  |                               |
| <b>Molecular Class</b>              |                         |            | <b>0.001</b>    |                           |            | <b>0.000073</b>               |
| Luminal A                           | 54(47.8)                | 59(52.2)   |                 | 40(35.4)                  | 73(64.6)   |                               |
| Luminal B                           | 20(44.4)                | 25(55.6)   |                 | 25(55.6)                  | 20(44.4)   |                               |
| HER2 Enriched                       | 30(83.3)                | 6(16.7)    |                 | 22(61.1)                  | 14(38.9)   |                               |

|      |          |         |  |          |         |  |
|------|----------|---------|--|----------|---------|--|
| TNBC | 17(65.4) | 9(34.6) |  | 21(80.8) | 5(19.2) |  |
|------|----------|---------|--|----------|---------|--|

Association with clinical and pathological parameters using categorised data was examined using Chi-squared test. All tests were 2-tailed

**Supplementary Table 9:** Association between RPA3 protein expression and clinicopathological characteristics in invasive breast cancers.

| Clinicopathological Parameters                                                                            | RPA3 nuclear expression |                | $\chi^2$<br>( <i>p</i> -value) | RPA3 cytoplasm expression |                | $\chi^2$<br>( <i>p</i> -value) |
|-----------------------------------------------------------------------------------------------------------|-------------------------|----------------|--------------------------------|---------------------------|----------------|--------------------------------|
|                                                                                                           | Low<br>N. (%)           | High<br>N. (%) |                                | Low<br>N. (%)             | High<br>N. (%) |                                |
| <b>Tumour Size (cm)</b>                                                                                   |                         |                | <b>0.000008</b>                |                           |                | <b>0.000382</b>                |
| ≤2                                                                                                        | 463(47.8)               | 505(52.2)      |                                | 498 (51.4)                | 470 (48.6)     |                                |
| >2                                                                                                        | 456 (58.5)              | 323 (41.5)     |                                | 467 (59.9)                | 312 (40.1)     |                                |
| <b>Tumour Grade</b>                                                                                       |                         |                | <b>1.99x10<sup>-10</sup></b>   |                           |                | <b>1.72x10<sup>-8</sup></b>    |
| Low                                                                                                       | 89 (38.8)               | 153(63.2)      |                                | 44(44)                    | 56(56)         |                                |
| Moderate                                                                                                  | 326 (49.1)              | 338(50.9)      |                                | 253 (46.3)                | 293(53.7)      |                                |
| High                                                                                                      | 504 (59.9)              | 337(40.1)      |                                | 668(60.7)                 | 433(39.3)      |                                |
| <b>Tumour Stage</b>                                                                                       |                         |                | <b>0.001</b>                   |                           |                | <b>0.005</b>                   |
| 1                                                                                                         | 525(49.2)               | 543(50.8)      |                                | 596(55.8)                 | 472(44.2)      |                                |
| 2                                                                                                         | 291(56.7)               | 222(43.3)      |                                | 261(50.9)                 | 252(49.1)      |                                |
| 3                                                                                                         | 103(62)                 | 63(38)         |                                | 108(65.1)                 | 58(34.9)       |                                |
| <b>Tubule Formation</b>                                                                                   |                         |                | <b>0.001</b>                   |                           |                | <b>1.72x10<sup>-8</sup></b>    |
| 1(>75% definite tubule)                                                                                   | 35(35)                  | 65(65)         |                                | 20(52.6)                  | 18(47)         |                                |
| 2(10%-75% definite tubule)                                                                                | 281(51.5)               | 265(48.5)      |                                | 303(54.9)                 | 249(45.1)      |                                |
| 3(<10% definite tubule)                                                                                   | 603(54.8)               | 498(45.2)      |                                | 642(55.5)                 | 515(44.5)      |                                |
| <b>Pleomorphism</b>                                                                                       |                         |                | <b>3.81x10<sup>-16</sup></b>   |                           |                | 0.923                          |
| Grade 1: Uniform cells with small nuclei                                                                  | 6(15.8)                 | 32(84.2)       |                                | 20(52.6)                  | 18(47.4)       |                                |
| Grade 2: large cells with open vesicular nuclei, visible nucleoli. Moderate variability in size and shape | 228(41.3)               | 324(58.7)      |                                | 303(54.9)                 | 249(45.1)      |                                |
| Grade 3: Vesicular nuclei, prominent nucleoli. Marked variation in size and shape                         | 685(59.2)               | 472(40.8)      |                                | 642(55.5)                 | 515(44.5)      |                                |
| <b>Mitotic Index</b>                                                                                      |                         |                | <b>3.187x10<sup>-9</sup></b>   |                           |                | 0.368                          |
| M1 (low; mitoses < 10)                                                                                    | 314(43.7)               | 405(56.3)      |                                | 383(53.3)                 | 336(46.7)      |                                |

|                                     |            |            |                              |            |            |                               |
|-------------------------------------|------------|------------|------------------------------|------------|------------|-------------------------------|
| M2(medium; mitoses 10-18)           | 203(59.2)  | 140(40.8)  |                              | 192(56)    | 151(44)    |                               |
| M3(high;mitosis >18)                | 402(58.7)  | 283(41.3)  |                              | 390(56.9)  | 295(43.1)  |                               |
| <b>Tumour Type</b>                  |            |            | <b>2.87x10<sup>-9</sup></b>  |            |            | <b>4.90 x10<sup>-11</sup></b> |
| Ductal (including mixed)            | 664 (58.5) | 471 (41.5) |                              | 630 (55.5) | 449 (46.9) |                               |
| Lobular                             | 52(36.6)   | 90(63.4)   |                              | 115 (81)   | 15 (19.5)  |                               |
| Medullary-like                      | 44(48.9)   | 46(51.1)   |                              | 52(57.8)   | 5 (62.5)   |                               |
| Miscellaneous                       | 23(50)     | 23(50)     |                              | 21(45.7)   | 2 (28.6)   |                               |
| Special Type                        | 12 (46.2)  | 14 (53.8)  |                              | 12(46.2)   | 16 (64.0)  |                               |
| Tubular                             | 121 (39.9) | 182(60.1)  |                              | 131(43.2)  | 172(56.8)  |                               |
| <b>Lymphovascular invasion</b>      |            |            | <b>0.00013</b>               |            |            | 0.565                         |
| Nil/Probable                        | 579(49.4)  | 593(50.6)  |                              | 653(55.7)  | 519(44.3)  |                               |
| Definite                            | 340(59.1)  | 235(40.9)  |                              | 312(54.3)  | 263(45.7)  |                               |
| <b>Nottingham Prognostic Index</b>  |            |            | <b>9.86x10<sup>-11</sup></b> |            |            | <b>0.017</b>                  |
| Good                                | 224(41.5)  | 316(58.5)  |                              | 276(51.1)  | 264(48.9)  |                               |
| Moderate                            | 517(55.5)  | 415(44.5)  |                              | 520(55.8)  | 412(44.2)  |                               |
| Poor                                | 178(64.7)  | 97(35.3)   |                              | 169(61.5)  | 106(38.5)  |                               |
| <b>Oestrogen Receptor Status</b>    |            |            | <b>0.001</b>                 |            |            | <b>0.018</b>                  |
| Negative                            | 234(60.0)  | 156(40)    |                              | 236(60.5)  | 154(39.5)  |                               |
| Positive                            | 683(50.5)  | 669(49.5)  |                              | 727(53.8)  | 625(46.2)  |                               |
| <b>Progesterone Receptor Status</b> |            |            | <b>0.000003</b>              |            |            | <b>2.70x10<sup>-7</sup></b>   |
| Negative                            | 410(59.8)  | 276(40.2)  |                              | 433(63.1)  | 253(36.9)  |                               |
| Positive                            | 498(48.2)  | 535(51.8)  |                              | 522(50.5)  | 511(49.5)  |                               |
| <b>HER2 Status</b>                  |            |            | <b>0.009</b>                 |            |            | 0.061                         |
| Negative                            | 766(51.5)  | 722(48.5)  |                              | 812(54.6)  | 676(45.4)  |                               |
| Positive                            | 142(60.7)  | 92(39.3)   |                              | 143(61.1)  | 91(38.9)   |                               |
| <b>Ki67 Index</b>                   |            |            | <b>0.004</b>                 |            |            | 0.704                         |
| Low                                 | 297(47.6)  | 327(52.4)  |                              | 335(53.7)  | 289(46.3)  |                               |
| High                                | 393(55.4)  | 316(44.6)  |                              | 388(54.7)  | 321(45.3)  |                               |
| <b>Molecular Class</b>              |            |            | <b>0.000015</b>              |            |            | <b>0.006</b>                  |
| Luminal A                           | 248(44.8)  | 305(55.2)  |                              | 280(50.6)  | 273(49.4)  |                               |

|                        |           |           |              |           |           |       |
|------------------------|-----------|-----------|--------------|-----------|-----------|-------|
| HER2 Enriched          | 51(60)    | 34(40)    |              | 57(67.1)  | 28(32.9)  |       |
| TNBC                   | 163(60.1) | 108(39.9) |              | 163(60.1) | 108(39.9) |       |
| Luminal B              | 328(56.6) | 251(43.4) |              | 324(56)   | 255(44)   |       |
| <b>Triple negative</b> |           |           | <b>0.006</b> |           |           | 0.089 |
| Non-triple negative    | 734(51.1) | 703(48.9) |              | 784(54.6) | 653(45.4) |       |
| Triple negative        | 163(60.1) | 108(39,9) |              | 163(60.1) | 108(39.9) |       |

Association with clinical and pathological parameters using categorised data was examined using Chi-squared test. All tests were 2-tailed



**Supplementary Table 10:** Correlation between RPA1 and expression of other DNA Repair Markers

| DNA Repair Marker | Correlation coefficient | P value                       | Number of samples |
|-------------------|-------------------------|-------------------------------|-------------------|
| RPA2              | 0.620**                 | <b>9.32 x10<sup>-45</sup></b> | 405               |
| RPA3_N            | 0.421**                 | <b>3 x10<sup>-17</sup></b>    | 369               |
| RPA3_C            | 0.388**                 | <b>1.05x10<sup>-14</sup></b>  | 369               |
| MRE11             | 0.405**                 | <b>3.45 x10<sup>-17</sup></b> | 419               |
| RAD50             | 0.225**                 | <b>2.24 x10<sup>-7</sup></b>  | 456               |
| NBS1              | 0.134**                 | <b>0.006</b>                  | 592               |
| APE1              | -0.009                  | 0.623                         | 351               |
| ATM               | 0.148**                 | <b>0.003</b>                  | 565               |
| ATR               | 0.007                   | 0.438                         | 630               |
| BLM               | 0.186**                 | <b>4.4 x10<sup>-5</sup></b>   | 624               |
| BRCA1             | 0.343**                 | <b>1.09 x10<sup>-19</sup></b> | 777               |
| BRCA2             | 0.039                   | 0.214                         | 767               |
| CHK1              | 0.268**                 | <b>2.38 x10<sup>-7</sup></b>  | 569               |
| CHK2              | 0.204**                 | <b>3.36 x10<sup>-7</sup></b>  | 559               |
| DNA-PKcs          | 0.268**                 | <b>3.14 x10<sup>-13</sup></b> | 569               |
| POLB              | 0.321**                 | <b>5.14 x10<sup>-16</sup></b> | 694               |
| ERCC1             | 0.202**                 | <b>2.8 x10<sup>-5</sup></b>   | 393               |
| PARP1             | 0.228**                 | <b>2.00 x10<sup>-6</sup></b>  | 645               |
| pChk1             | 0.258**                 | <b>3.70 x10<sup>-10</sup></b> | 786               |
| RAD51             | 0.322**                 | <b>2.06 x10<sup>-9</sup></b>  | 497               |
| RECQL1            | 0.321**                 | <b>9.36 x10<sup>-14</sup></b> | 467               |
| RECQL4            | 0.155**                 | <b>2.77 x 10<sup>-4</sup></b> | 510               |
| RECQL5            | 0.212**                 | <b>1.87 x 10<sup>-4</sup></b> | 609               |
| SMUG              | 0.234**                 | <b>1.03 x10<sup>-7</sup></b>  | 607               |
| $\gamma$ H2AX     | 0.275**                 | <b>2.16 x10<sup>-11</sup></b> | 541               |

\*\* . Correlation is significant at the 0.01 level (2-tailed).

\* . Correlation is significant at the 0.05 level (2-tailed).

**Supplementary Table 11:** Correlation between RPA2 and expression of other DNA Repair Markers

| DNA Repair Marker | Correlation coefficient | P value                       | Number of samples |
|-------------------|-------------------------|-------------------------------|-------------------|
| RPA1              | 0.622**                 | <b>9.32x10<sup>-45</sup></b>  | 405               |
| RPA3_N            | 0.372**                 | <b>4.92x10<sup>-7</sup></b>   | 172               |
| RPA3_C            | 0.202**                 | <b>0.008</b>                  | 172               |
| MRE11             | 0.172*                  | <b>0.0120</b>                 | 208               |
| RAD50             | 0.235**                 | <b>1.98 x10<sup>-4</sup></b>  | 226               |
| NBS1              | 0.043                   | 0.579                         | 300               |
| APE1              | 0.039                   | 0.524                         | 209               |
| ATM               | 0.103                   | 0.174                         | 310               |
| ATR               | 0.051                   | 0.270                         | 339               |
| BLM               | 0.157**                 | <b>0.001</b>                  | 342               |
| BRCA1             | 0.324**                 | <b>5.12 x10<sup>-13</sup></b> | 442               |
| BRCA2             | 0.093                   | <b>0.023</b>                  | 404               |
| CHK1              | 0.258**                 | <b>0.004</b>                  | 299               |
| CHK2              | 0.057                   | 0.126                         | 316               |
| DNA-PKcs          | 0.182**                 | <b>0.002</b>                  | 312               |
| POLB              | 0.209**                 | <b>1.5 x10<sup>-5</sup></b>   | 378               |
| ERCC1             | 0.110                   | 0.084                         | 218               |
| PARP1             | 0.147**                 | <b>0.004</b>                  | 339               |
| pChk1             | 0.000                   | 0.187                         | 418               |
| RAD51             | 0.170**                 | <b>0.035</b>                  | 255               |
| RECQL1            | 0.148*                  | 0.064                         | 257               |
| RECQL4            | 0.267**                 | <b>7.29 x10<sup>-7</sup></b>  | 284               |
| RECQL5            | 0.086                   | 0.421                         | 324               |
| SMUG              | 0.194**                 | <b>0.008</b>                  | 311               |
| $\gamma$ H2AX     | 0.142*                  | <b>0.008</b>                  | 300               |

\*\* . Correlation is significant at the 0.01 level (2-tailed).

**Supplementary Table 12:** Correlation between RPA3 and expression of other DNA Repair Markers

| DNA Repair Marker | Correlation coefficient | P value                      | Number of samples | Correlation coefficient   | P value                      | Number of samples |
|-------------------|-------------------------|------------------------------|-------------------|---------------------------|------------------------------|-------------------|
|                   | RPA3 nuclear expression |                              |                   | RPA3 cytoplasm expression |                              |                   |
| RPA1              | 0.421**                 | <b>3 x10<sup>-17</sup></b>   | 369               | 0.388**                   | <b>1.05x10<sup>-14</sup></b> | 369               |
| RPA2              | 0.372**                 | <b>4.92x10<sup>-7</sup></b>  | 172               | 0.202**                   | <b>0.008</b>                 | 172               |
| MRE11             | 0.304**                 | <b>1.35x10<sup>-9</sup></b>  | 381               | 0.256**                   | <b>4.24x10<sup>-7</sup></b>  | 381               |
| RAD50             | 0.209**                 | <b>0.000018</b>              | 416               | 0.190**                   | <b>0.000097</b>              | 416               |
| NBS1              | 0.047                   | 0.282                        | 533               | -0.055                    | 0.208                        | 533               |
| APE1              | -0.007                  | 0.907                        | 258               | 0.091                     | 0.145                        | 258               |
| ATM               | 0.035                   | 0.479                        | 414               | 0.013                     | 0.795                        | 414               |
| ATR               | -0.023                  | 0.593                        | 555               | 0.077                     | 0.069                        | 555               |
| BLM               | 0.207**                 | <b>9.14x10<sup>-7</sup></b>  | 552               | 0.033                     | 0.445                        | 552               |
| BRCA1             | 0.242**                 | <b>1.74x10<sup>-8</sup></b>  | 529               | 0.147**                   | <b>0.001</b>                 | 529               |
| BRCA2             | 0.062                   | 0.188                        | 447               | 0.045                     | 0.343                        | 447               |
| CHK1              | 0.235**                 | <b>3.53x10<sup>-7</sup></b>  | 458               | 0.128**                   | <b>0.006</b>                 | 458               |
| CHK2              | 0.234**                 | <b>1.91x10<sup>-7</sup></b>  | 483               | 0.203**                   | <b>0.000007</b>              | 483               |
| DNA-PKcs          | 0.290**                 | <b>5.25x10<sup>-11</sup></b> | 493               | 0.254**                   | <b>1.13x10<sup>-8</sup></b>  | 493               |
| POLB              | 0.319**                 | <b>8.51x10<sup>-15</sup></b> | 565               | 0.264**                   | <b>1.72x10<sup>10</sup></b>  | 565               |
| ERCC1             | 0.191**                 | <b>0.000066</b>              | 431               | 0.109*                    | <b>0.023</b>                 | 431               |
| PARP1             | 0.221**                 | <b>5.11x10<sup>-7</sup></b>  | 507               | 0.211**                   | <b>0.000002</b>              | 507               |
| pChk1             | 0.324**                 | <b>1.84x10<sup>-16</sup></b> | 613               | 0.177**                   | <b>0.000011</b>              | 613               |
| RAD51             | 0.320**                 | <b>3.96x10<sup>-11</sup></b> | 407               | 0.177**                   | <b>0.000328</b>              | 407               |
| RECQL1            | 0.309**                 | <b>2.05x10<sup>-12</sup></b> | 494               | 0.269**                   | <b>1.27x10<sup>-9</sup></b>  | 494               |
| RECQL4            | 0.324**                 | <b>1.13x10<sup>-13</sup></b> | 499               | 0.234**                   | <b>1.20x10<sup>-7</sup></b>  | 499               |
| RECQL5            | 0.220**                 | <b>2.18x10<sup>-7</sup></b>  | 542               | 0.222**                   | <b>1.75x10<sup>-7</sup></b>  | 542               |
| SMUG              | 0.150**                 | <b>0.001</b>                 | 470               | 0.038                     | 0.412                        | 470               |
| γH2AX             | 0.296**                 | <b>1.25x10<sup>-10</sup></b> | 455               | 0.226**                   | <b>0.000001</b>              | 455               |

**Supplementary Table 13:** Correlation between RPA1 and expression of endocrine resistance markers

| Endocrine resistance Marker | Correlation coefficient | P value                     | Number of samples |
|-----------------------------|-------------------------|-----------------------------|-------------------|
| Ki67                        | -0.094**                | <b>0.009</b>                | 405               |
| VEGF                        | 0.011                   | 0.894                       | 164               |
| PIK3CA                      | -0.159                  | 0.126                       | 683               |
| MTOR                        | 0.024                   | 0.513                       | 763               |
| CyclinD1                    | 0.111                   | 0.059                       | 290               |
| GATA3                       | 0.221**                 | <b>2.16x10<sup>-7</sup></b> | 541               |
| FOXA1                       | 0.208**                 | <b>3.82x10<sup>-7</sup></b> | 588               |
| FOXO3A_C                    | 0.139**                 | <b>0.002</b>                | 509               |
| FOXO3A_N                    | 0.147**                 | <b>0.001</b>                | 509               |
| P53                         | -0.001                  | 0.976                       | 867               |
| ER_beta1                    | 0.120*                  | <b>0.032</b>                | 322               |
| ER_beta2                    | 0.320**                 | <b>1.45x10<sup>-8</sup></b> | 300               |
| cMYC_C                      | 0.219**                 | <b>0.002</b>                | 207               |
| cMYC_N                      | 0.058                   | 0.407                       | 207               |
| pChk1                       | 0.221*                  | <b>3.7x10<sup>-10</sup></b> | 786               |
| CHK1_C                      | 0.052                   | 0.218                       | 568               |
| CHK1_N                      | 0.209**                 | <b>5.27x10<sup>-7</sup></b> | 568               |

\*\*.

Correlation is significant at the 0.01 level (2-tailed).

\*. Correlation is significant at the 0.05 level (2-tailed).

**Supplementary Table 14:** Correlation between RPA2 and expression of endocrine resistance markers

| Endocrine resistance Marker | Correlation coefficient | P value      | Number of samples |
|-----------------------------|-------------------------|--------------|-------------------|
| Ki67                        | -0.025                  | 0.617        | 416               |
| VEGF                        | 0.137                   | 0.221        | 82                |
| PIK3CA                      | 0.007                   | 0.891        | 357               |
| MTOR                        | 0.020                   | 0.687        | 401               |
| CyclinD1                    | 0.005                   | 0.954        | 120               |
| GATA3                       | 0.122*                  | <b>0.035</b> | 299               |
| FOXA1                       | 0.024                   | 0.671        | 311               |
| FOXO3A_C                    | 0.156**                 | <b>0.009</b> | 279               |
| FOXO3A_N                    | 0.087                   | 0.087        | 279               |
| P53                         | 0.054                   | 0.246        | 457               |
| ER_beta1                    | 0.087                   | 0.329        | 128               |
| ER_beta2                    | 0.228*                  | <b>0.011</b> | 124               |
| cMYC_C                      | 0.194                   | 0.061        | 94                |
| cMYC_N                      | 0.139                   | 0.182        | 94                |
| CHK1_C                      | 0.159**                 | <b>0.006</b> | 298               |
| CHK1_N                      | 0.150**                 | <b>0.010</b> | 289               |

\*\* . Correlation is significant at the 0.01 level (2-tailed).

\* . Correlation is significant at the 0.05 level (2-tailed).

**Supplementary Table 15:** Correlation between RPA3 and expression of endocrine resistance marker

| Endocrine resistance Marker | Correlation coefficient        | P value                     | Number of samples | Correlation coefficient          | P value                     | Number of samples |
|-----------------------------|--------------------------------|-----------------------------|-------------------|----------------------------------|-----------------------------|-------------------|
|                             | <b>RPA3 nuclear expression</b> |                             |                   | <b>RPA3 cytoplasm expression</b> |                             |                   |
| Ki67                        | 0.020                          | 0.632                       | 548               | 0.025                            | 0.560                       | 548               |
| VEGF                        | 0.092                          | 0.307                       | 125               | 0.175                            | 0.051                       | 125               |
| PIK3CA                      | -0.158**                       | <b>0.000326</b>             | 516               | -.057                            | 0.197                       | 516               |
| MTOR                        | 0.043                          | 0.302                       | 575               | 0.117**                          | <b>0.005</b>                | 575               |
| CyclinD1                    | -0.061                         | 0.229                       | 295               | 0.080                            | 0.172                       | 295               |
| GATA3                       | 0.150**                        | <b>0.002</b>                | 413               | 0.115*                           | <b>0.020</b>                | 413               |
| FOXA1                       | 0.237**                        | <b>3.16x10<sup>-7</sup></b> | 456               | 0.114*                           | <b>0.015</b>                | 456               |
| FOXO3A_C                    | -0.018                         | 0.725                       | 373               | 0.100                            | 0.054                       | 373               |
| FOXO3A_N                    | 0.143**                        | <b>0.006</b>                | 373               | -.048                            | 0.353                       | 373               |
| P53                         | -0.014                         | 0.730                       | 634               | -0.028                           | 0.478                       | 634               |
| ER_beta1                    | 0.026                          | 0.648                       | 310               | 0.126*                           | <b>0.026</b>                | 310               |
| ER_beta2                    | 0.265**                        | <b>0.000007</b>             | 280               | 0.188**                          | <b>0.002</b>                | 280               |
| cMYC_C                      | 0.181*                         | <b>0.012</b>                | 191               | 0.154*                           | <b>0.034</b>                | 191               |
| cMYC_N                      | 0.240**                        | <b>0.001</b>                | 191               | 0.023                            | 0.756                       | 191               |
| CHK1_C                      | 0.084                          | 0.071                       | 458               | 0.244**                          | <b>1.29x10<sup>-7</sup></b> | 458               |
| CHK1_N                      | 0.235**                        | <b>3.53x10<sup>-7</sup></b> | 458               | 0.128**                          | <b>0.006</b>                | 458               |

**Supplementary Table 16:** Pathway analysis of genes differentially expressed between tumours with low and high RPA complex.

| Gene Set                                                | Description                                  | Size | Expect | Ratio  | P Value      | FDR          |
|---------------------------------------------------------|----------------------------------------------|------|--------|--------|--------------|--------------|
| <b><i>Genes expressed higher in low RPA tumours</i></b> |                                              |      |        |        |              |              |
| hsa04740                                                | Olfactory transduction                       | 448  | 22.613 | 3.7147 | 0            | 0            |
| hsa05034                                                | Alcoholism                                   | 180  | 9.0854 | 4.2926 | 2.9976e-15   | 4.8861e-13   |
| hsa05322                                                | Systemic lupus erythematosus                 | 133  | 6.7131 | 4.9158 | 7.1054e-15   | 7.7212e-13   |
| hsa04742                                                | Taste transduction                           | 83   | 4.1894 | 4.2966 | 1.0902e-7    | 0.0000088851 |
| hsa00140                                                | Steroid hormone biosynthesis                 | 60   | 3.0285 | 4.2926 | 0.0000066300 | 0.00043228   |
| hsa00980                                                | Metabolism of xenobiotics by cytochrome P450 | 76   | 3.8361 | 3.6496 | 0.000021370  | 0.0011611    |
| hsa05204                                                | Chemical carcinogenesis                      | 82   | 4.1389 | 3.3825 | 0.000051856  | 0.0024150    |
| hsa00982                                                | Drug metabolism                              | 72   | 3.6342 | 3.3020 | 0.00022474   | 0.0091580    |
| hsa00830                                                | Retinol metabolism                           | 67   | 3.3818 | 3.2527 | 0.00046723   | 0.016924     |
| hsa04080                                                | Neuroactive ligand-receptor interaction      | 277  | 13.981 | 1.9311 | 0.00072386   | 0.023598     |
| <b><i>Genes expressed lower in low RPA tumours</i></b>  |                                              |      |        |        |              |              |
| hsa04080                                                | Neuroactive ligand-receptor interaction      | 277  | 1.7143 | 5.2498 | 0.000039338  | 0.012824     |

## SUPPLEMENTARY MATERIALS

### Supplementary Figures

Supplementary Figure 1

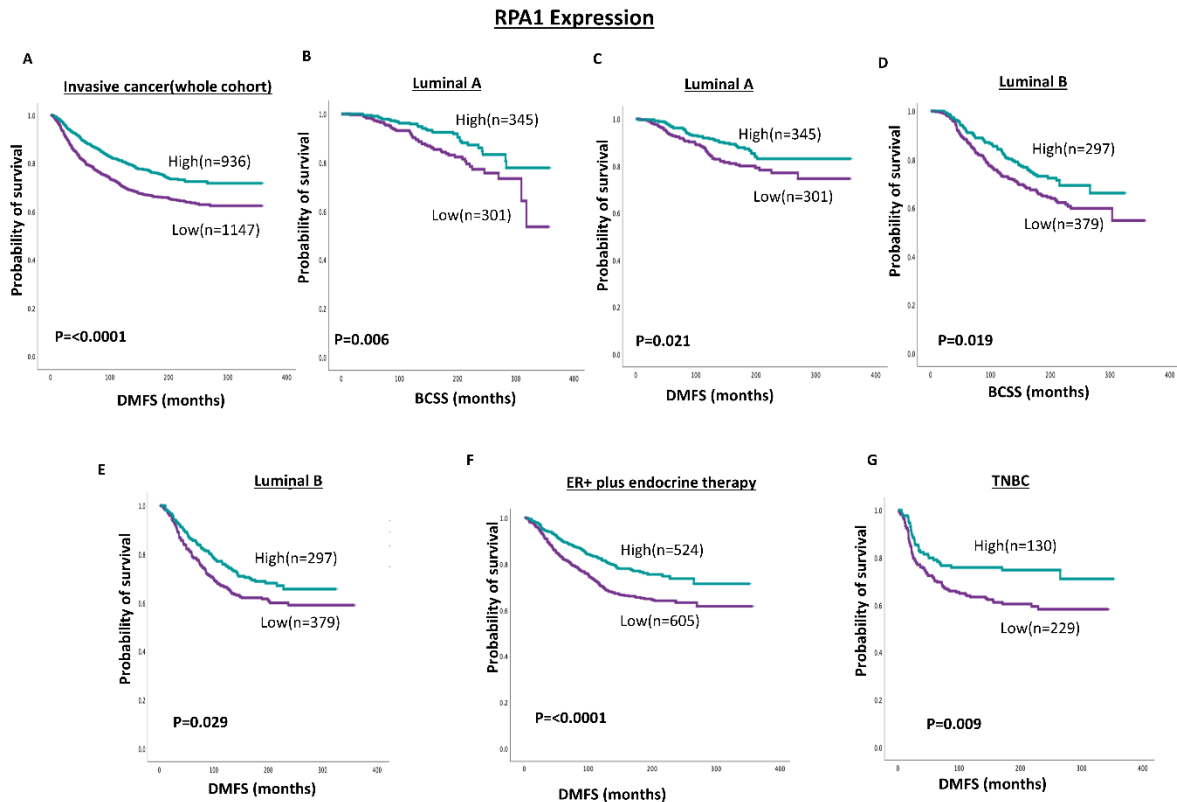

**Supplementary Figure 1: RPA1 and breast cancer.** (A). Kaplan-Meier curve for RPA1 nuclear protein expression and DMFS in in whole cohort. (B). Kaplan-Meier curve for RPA1 nuclear protein expression and BCSS in Luminal A cohort. (C). Kaplan-Meier curve for RPA1 nuclear protein expression and DMFS in Luminal A cohort. (D). Kaplan-Meier curve for RPA1 nuclear protein expression and BCSS in Luminal B cohort. (E). Kaplan-Meier curve for RPA1 nuclear protein expression and DMFS in Luminal B cohort. (F). Kaplan-Meier curve for RPA1 nuclear protein expression and DMFS in TNBC cohort. Survival rates were determined using Kaplan–Meier method and compared by the log-rank test. All analyses were conducted using Statistical Package for the Social Sciences (SPSS, version 22, Chicago, IL, USA) software for windows. P value of less than 0.05 was identified as statistically significant.



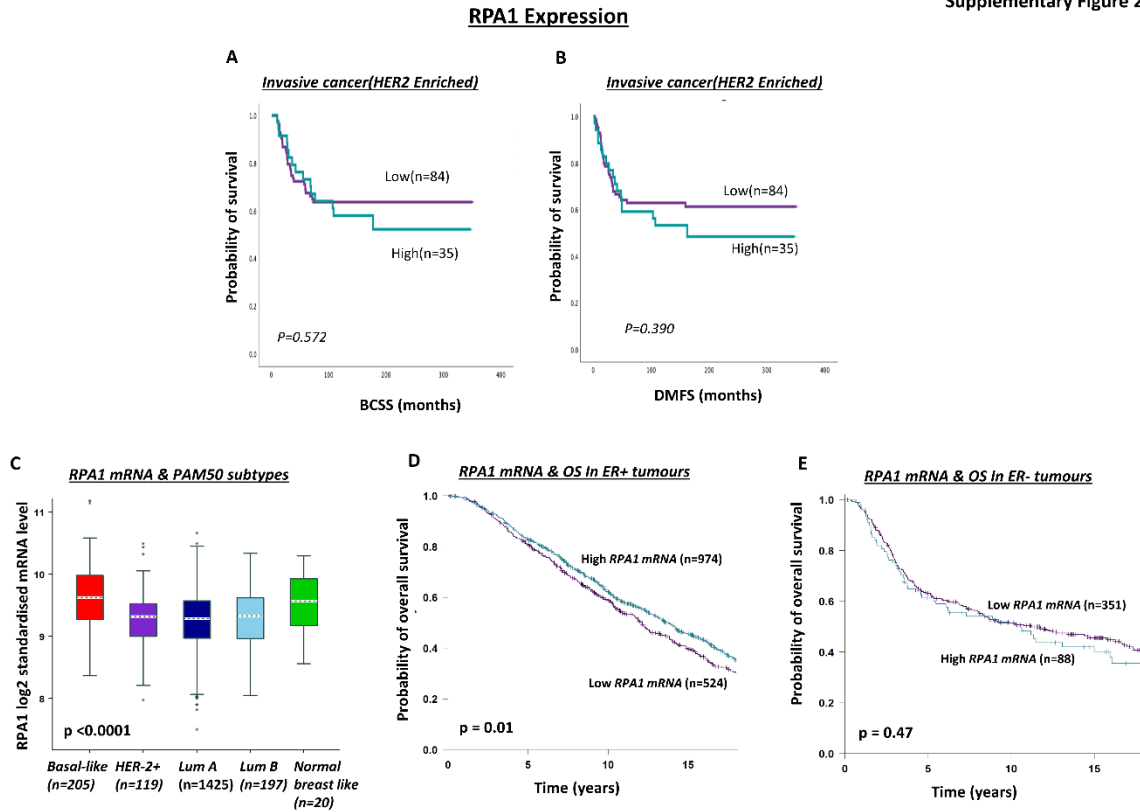

**Supplementary Figure 2: RPA1 and breast cancer.** (A). Kaplan-Meier curve for RPA1 nuclear protein expression and BCSS in HER2 Enriched cohort. (B). Kaplan-Meier curve for RPA1 nuclear protein expression and DMFS in HER2 Enriched cohort. (C). *RPA1 mRNA* expression and PAM50 molecular subtypes of breast cancer [The white dotted line represents the median, upper closed bar represents the upper quartile value, closed lower bar represents the lower quartile value, upper grey line represents maximum data value, lower line represents minimum data value, dots are outliers.]. (D). Kaplan–Meier curve for RPA1 mRNA expression and BCSS in ER+ cohort. (E) Kaplan–Meier curve for RPA2 mRNA expression and BCSS in ER– cohort. Survival rates were determined using Kaplan–Meier method and compared by the log-rank test. All analyses were conducted using Statistical Package for the Social Sciences (SPSS, version 22, Chicago, IL, USA) software for windows. P value of less than 0.05 was identified as statistically significant.



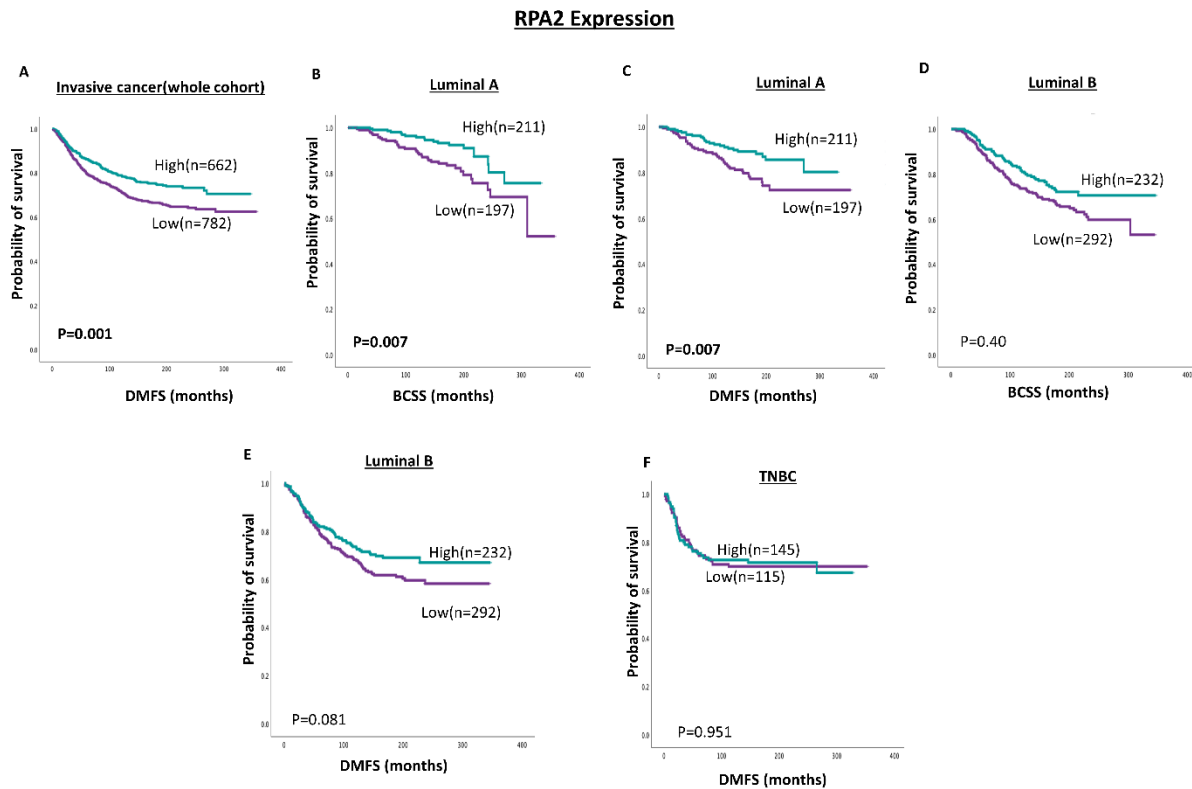

**Supplementary Figure 3: RPA2 and breast cancer.** (A). Kaplan-Meier curve for RPA2 nuclear protein expression and DMFS in in whole cohort. (B). Kaplan-Meier curve for RPA2 nuclear protein expression and BCSS in Luminal A cohort. (C). Kaplan-Meier curve for RPA2 nuclear protein expression and DMFS in Luminal A cohort. (D). Kaplan-Meier curve for RPA2 nuclear protein expression and BCSS in Luminal B cohort. (E). Kaplan-Meier curve for RPA2 nuclear protein expression and DMFS in Luminal B cohort. (F). Kaplan-Meier curve for RPA2 nuclear protein expression and DMFS in TNBC cohort. Survival rates were determined using Kaplan–Meier method and compared by the log-rank test. All analyses were conducted using Statistical Package for the Social Sciences (SPSS, version 22, Chicago, IL, USA) software for windows. P value of less than 0.05 was identified as statistically significant.

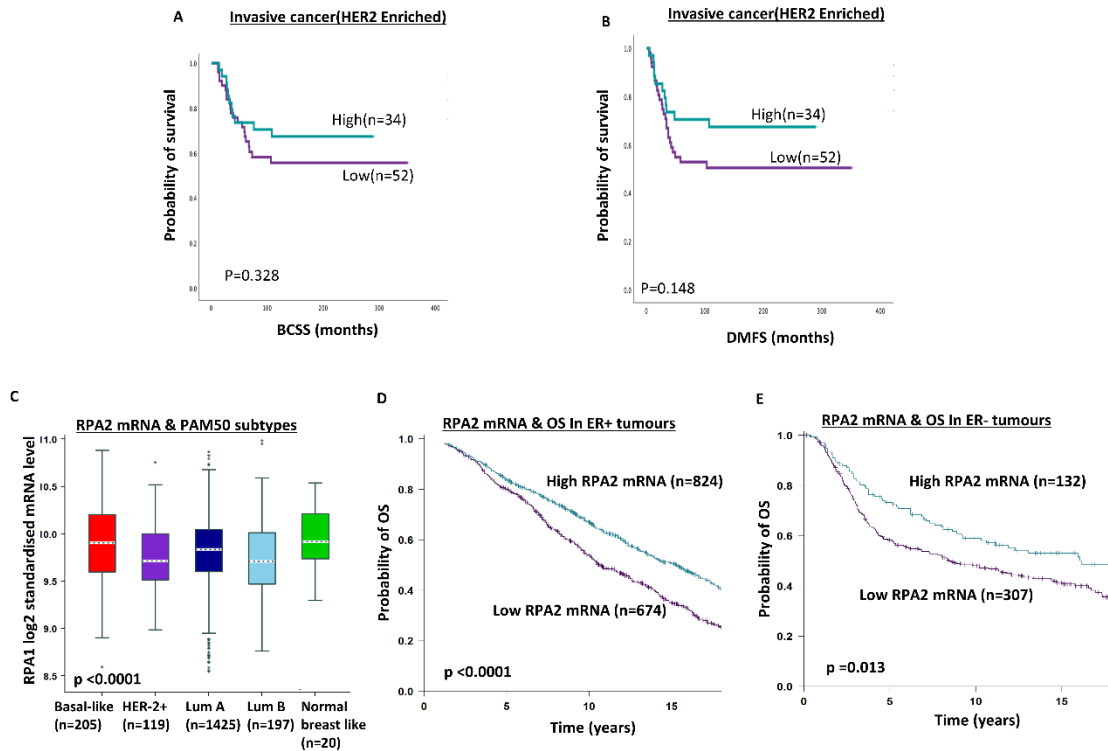

**Supplementary Figure 4: RPA2 and breast cancer.** (A). Kaplan-Meier curve for RPA2 nuclear protein expression and BCSS in HER2 Enriched cohort. (B). Kaplan-Meier curve for RPA2 nuclear protein expression and DMFS in HER2 Enriched cohort. (C). *RPA2 mRNA* expression and PAM50 molecular subtypes of breast cancer [The white dotted line represents the median, upper closed bar represents the upper quartile value, closed lower bar represents the lower quartile value, upper grey line represents maximum data value, lower line represents minimum data value, dots are outliers.]. (D). Kaplan-Meier curve for RPA2 mRNA expression and BCSS in ER+ cohort. (E). Kaplan-Meier curve for RPA2 mRNA expression and BCSS in ER- cohort. Survival rates were determined using Kaplan-Meier method and compared by the log-rank test. All analyses were conducted using Statistical Package for the Social Sciences (SPSS, version 22, Chicago, IL, USA) software for windows. P value of less than 0.05 was identified as statistically significant.



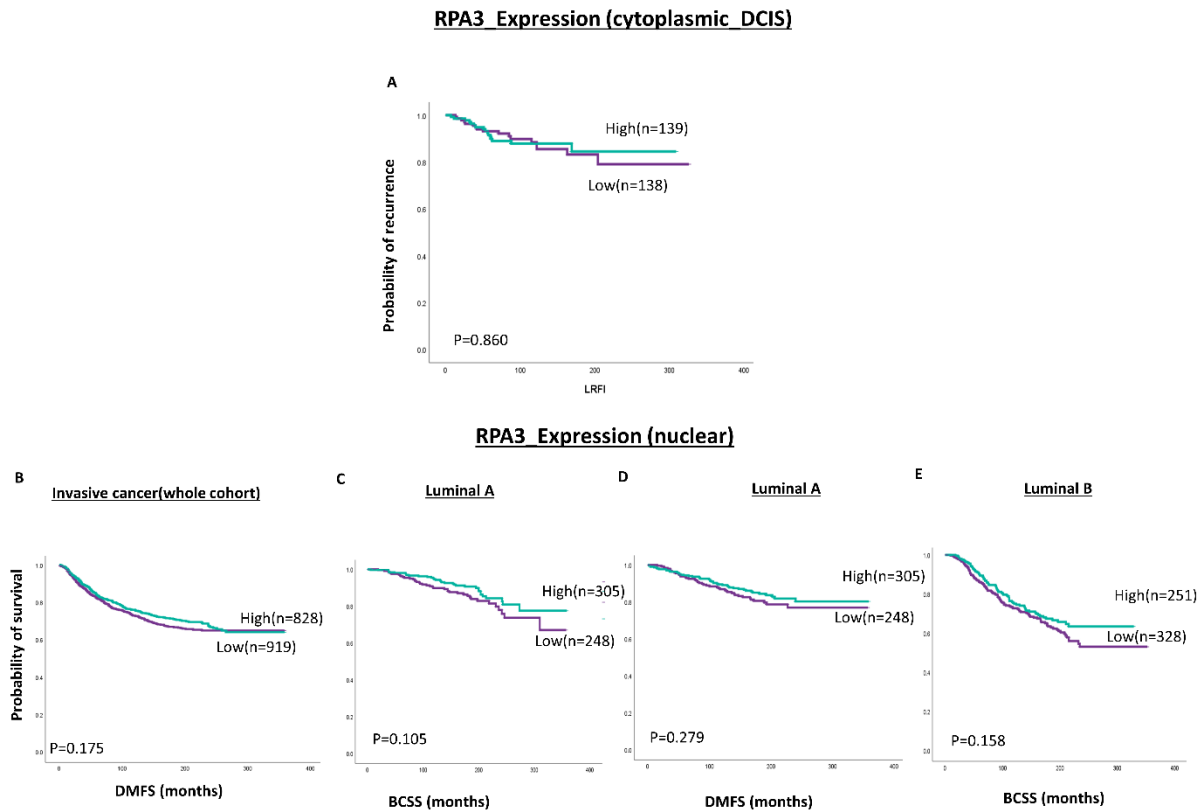

**Supplementary Figure 5: RPA3 and breast cancer.** (A). Kaplan-Meier curve for RPA3 cytoplasmic protein expression and LRFI in DCIS cohort. (B). Kaplan-Meier curve for RPA3 nuclear protein expression and DMFS in whole cohort. (C). Kaplan-Meier curve for RPA3 nuclear protein expression and BCSS in Luminal A cohort. (D). Kaplan-Meier curve for RPA3 nuclear protein expression and DMFS in Luminal A cohort. (E). Kaplan-Meier curve for RPA3 nuclear protein expression and BCSS in Luminal B cohort. Survival rates were determined using Kaplan–Meier method and compared by the log-rank test. All analyses were conducted using Statistical Package for the Social Sciences (SPSS, version 22, Chicago, IL, USA) software for windows. P value of less than 0.05 was identified as statistically significant.

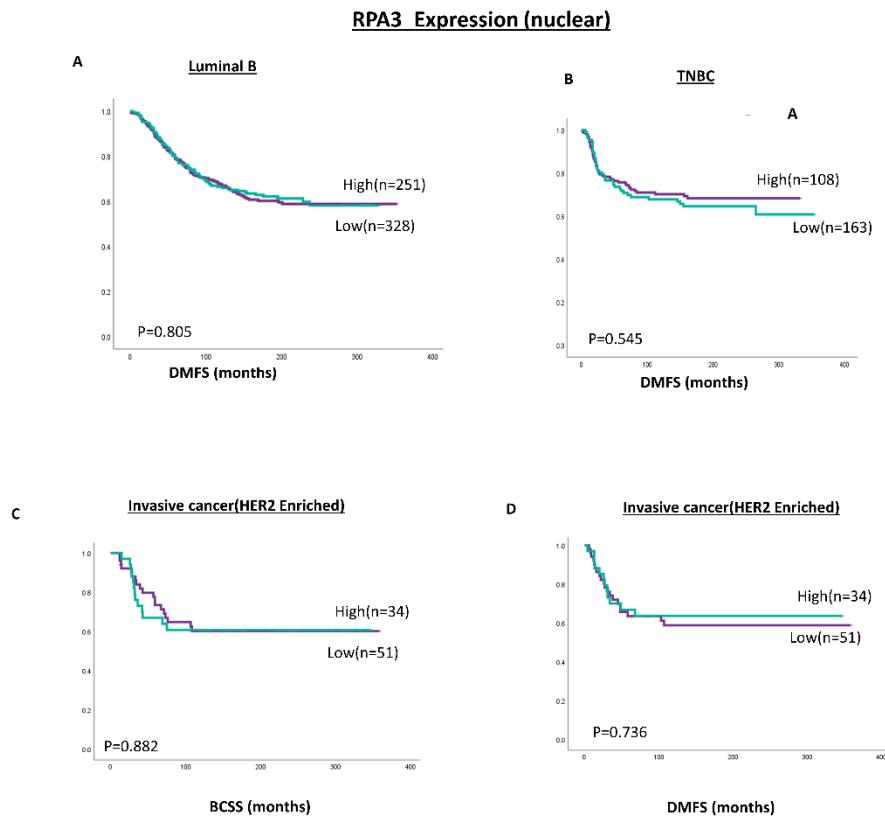

**Supplementary Figure 6: RPA3 and breast cancer.** (A). Kaplan-Meier curve for RPA3 nuclear protein expression and DMFS in Luminal B cohort. (B). Kaplan-Meier curve for RPA3 nuclear protein expression and DMFS in TNBC cohort. (C). Kaplan-Meier curve for RPA3 nuclear protein expression and BCSS in HER2 Enriched cohort. (D). Kaplan-Meier curve for RPA3 nuclear protein expression and DMFS in HER2 Enriched cohort. Survival rates were determined using Kaplan–Meier method and compared by the log-rank test. All analyses were conducted using Statistical Package for the Social Sciences (SPSS, version 22, Chicago, IL, USA) software for windows. P value of less than 0.05 was identified as statistically significant.

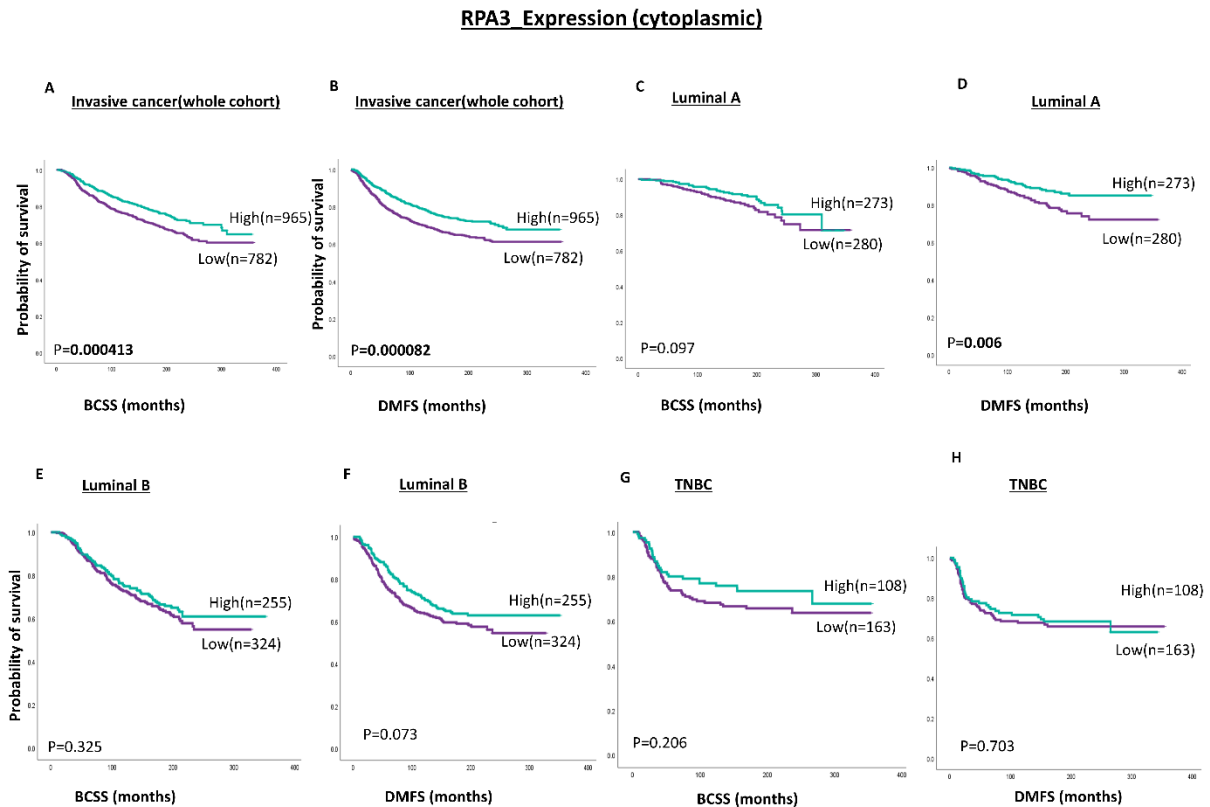

**Supplementary Figure 7: RPA3 and breast cancer.** (A). Kaplan-Meier curve for RPA3 cytoplasmic protein expression and breast cancer specific survival (BCSS) in whole cohort. (B). Kaplan-Meier curve for RPA3 cytoplasmic protein expression and DMFS in in whole cohort. (C). Kaplan-Meier curve for RPA3 cytoplasmic protein expression and BCSS in Luminal A cohort. (D). Kaplan-Meier curve for RPA3 cytoplasmic protein expression and DMFS in Luminal A cohort. (E). Kaplan-Meier curve for RPA3 cytoplasmic protein expression and BCSS in Luminal B cohort. (F). Kaplan-Meier curve for RPA3 cytoplasmic protein expression and DMFS in Luminal B cohort. (G). Kaplan-Meier curve for RPA3 cytoplasmic protein expression and BCSS in TNBC cohort. (H). Kaplan-Meier curve for RPA3 cytoplasmic protein expression and DMFS in TNBC cohort. Survival rates were determined using Kaplan–Meier method and compared by the log-rank test. All analyses were conducted using Statistical Package for the Social Sciences (SPSS, version 22, Chicago, IL, USA) software for windows. P value of less than 0.05 was identified as statistically significant.



**RPA3 Expression (cytoplasmic)**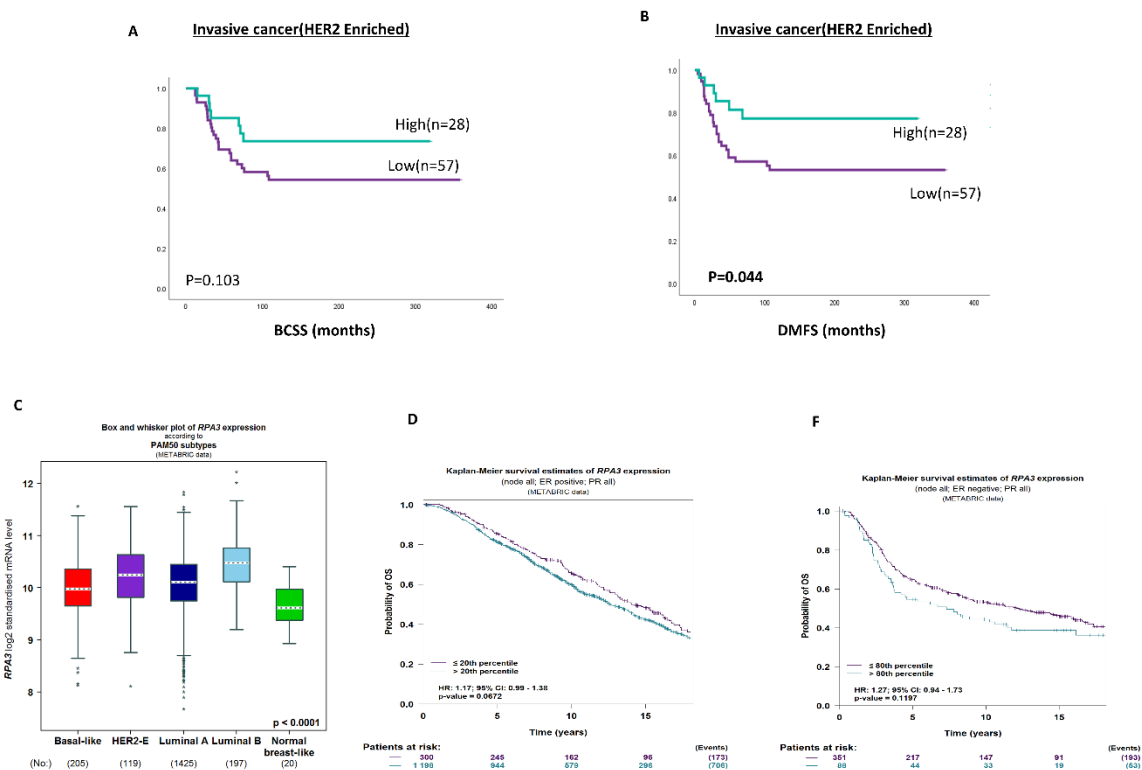

**Supplementary Figure 8: RPA3 and breast cancer.** (A). Kaplan-Meier curve for RPA3 cytoplasmic protein expression and BCSS in HER2 Enriched cohort. (B). Kaplan-Meier curve for RPA3 cytoplasmic protein expression and DMFS in HER2 Enriched cohort. (C). *RPA3* mRNA expression and PAM50 molecular subtypes of breast cancer [The white dotted line represents the median, upper closed bar represents the upper quartile value, closed lower bar represents the lower quartile value, upper grey line represents maximum data value, lower line represents minimum data value, dots are outliers.]. (D). Kaplan-Meier curve for *RPA3* mRNA expression and BCSS in ER+ cohort. (E). Kaplan-Meier curve for *RPA3* mRNA expression and BCSS in ER- cohort. Survival rates were determined using Kaplan-Meier method and compared by the log-rank test. All analyses were conducted using Statistical Package for the Social Sciences (SPSS, version 22, Chicago, IL, USA) software for windows. P value of less than 0.05 was identified as statistically significant.



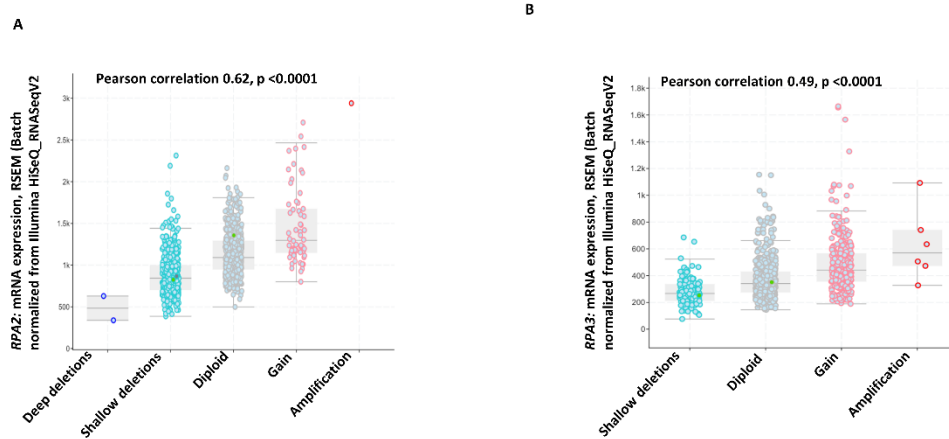

**Supplementary Figure 9: RPA2 and RPA3 bioinformatics.** (A). Comparison of RPA2 gene expression to copy number variation in TCGA-BRCA Pan cancer cohort (n = 994). GISTIC analysis is shown for changes in *RPA2* mRNA levels in tumours with copy number variations for TCGA-BRCA Pan cancer cohort (n = 994). The expression data was from normalized illumina HiSeq RNA-Seq data. The copy number variations are deep deletions (>2 copies deleted), shallow deletion (few copies altered), diploid, gains (few copies gained), amplification (>2 copies gained). (B). Comparison of RPA3 gene expression to copy number variation in TCGA-BRCA Pan cancer cohort (n = 994) is shown here. [The grey line represents the median, upper closed bar represents the upper quartile value, closed lower bar represents the lower quartile value, upper grey line represents maximum data value, lower line represents minimum data value, dots represent individual values]

**Promoter methylation and gene expression**

Supplementary Figure 10

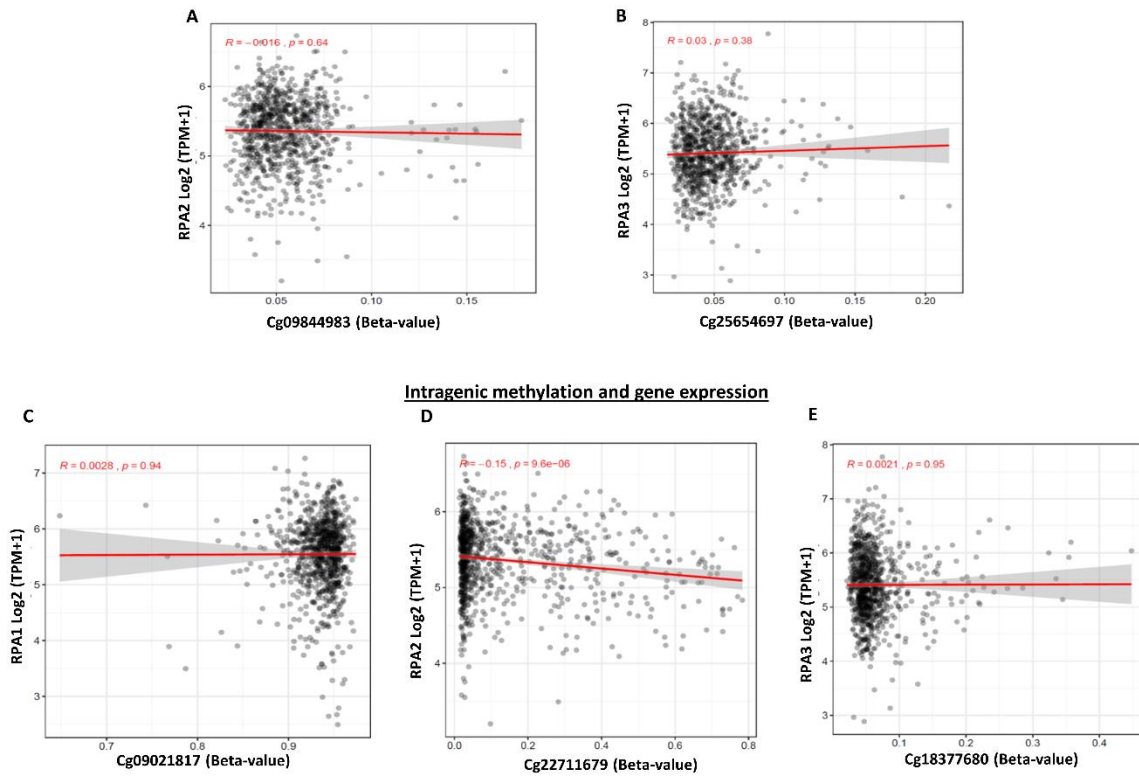

**Supplementary Figure 10: RPA bioinformatics.** (A). DNA promoter methylation correlations with RPA2 gene expression is shown here. (B) DNA promoter methylation correlations with RPA3 gene expression is shown here. Intragenic methylation and correlation to RPA1 (C), RPA2 (D) and RPA3 (E) gene expression is shown here (see methods sections for more details).

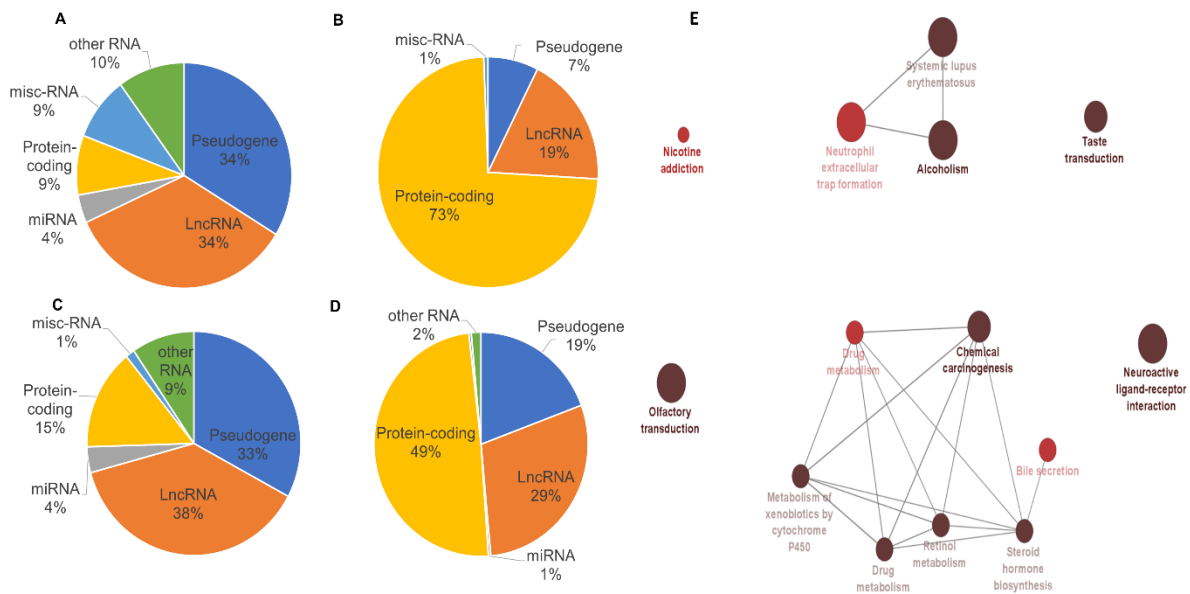

**Supplementary Figure 11: RPA bioinformatics.** The percentage of non-coding RNAs (lncRNA, pseudogenes and miRNAs) plus coding genes are shown for **A**) RNAs with high expression in low *RPA2* tumours (n = 8737 confirmed gene types), **B**) RNAs with low expression in low *RPA2* tumours (n = 162), **C**) RNAs with high expression in low *RPA3* tumours (n = 8581), **D**) RNAs with low expression in low *RPA3* tumours (n = 274) and **E**) Cluego analysis was performed to identify common genes and pathways that were differentially expressed between low and high RPA. Genes (938) were represented in 14 terms and 6 groups (term-term interaction).

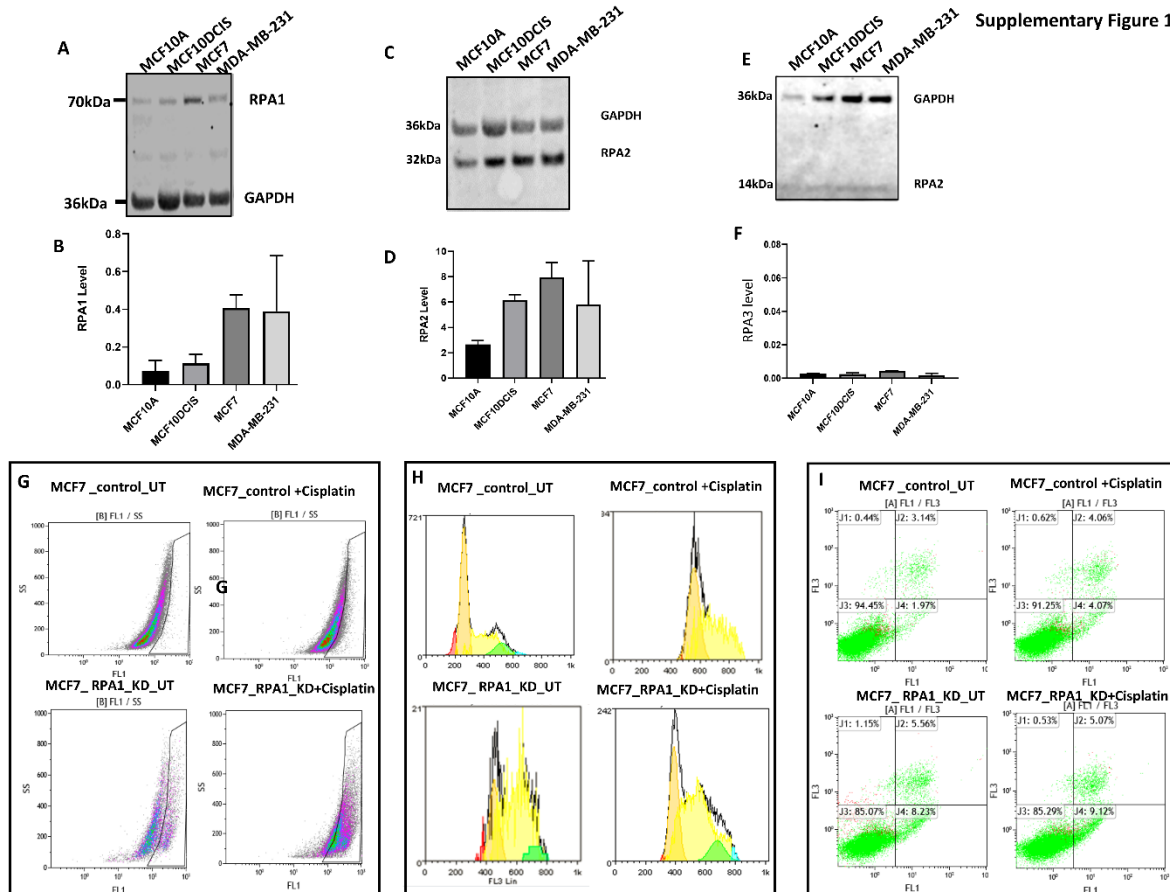

**Supplementary Figure 12: RPA expression in a panel of breast cell lines. (A).** Western blot of RPA1 protein expression in MCF10A, MCF10DCIS, MCF7 and MDA-MB-231 cells. **(B).** Quantification of RPA1 expression in MCF10A, MCF10DCIS, MCF7 and MDA-MB-231 cells. **(C).** Western blot of RPA2 protein expression in MCF10A, MCF10DCIS, MCF7 and MDA-MB-231 cells. **(D).** Quantification of RPA2 expression in MCF10A, MCF10DCIS, MCF7 and MDA-MB-231 cells. **(E).** Western blot of RPA3 protein expression in MCF10A, MCF10DCIS, MCF7 and MDA-MB-231 cells. **(F).** Quantification of RPA3 expression in MCF10A, MCF10DCIS, MCF7 and MDA-MB-231 cells. **(G).** Gamma H2AX analysis by flow cytometry in MCF7 control and RPA1\_KD cells untreated or treated with cisplatin. **(H).** Cell cycle analysis by flow cytometry in MCF7 control and RPA1\_KD cells untreated or treated with cisplatin. **(I).** Annexin V assay analysis by flow cytometry in MCF7 control and RPA1\_KD cells untreated or treated with cisplatin.

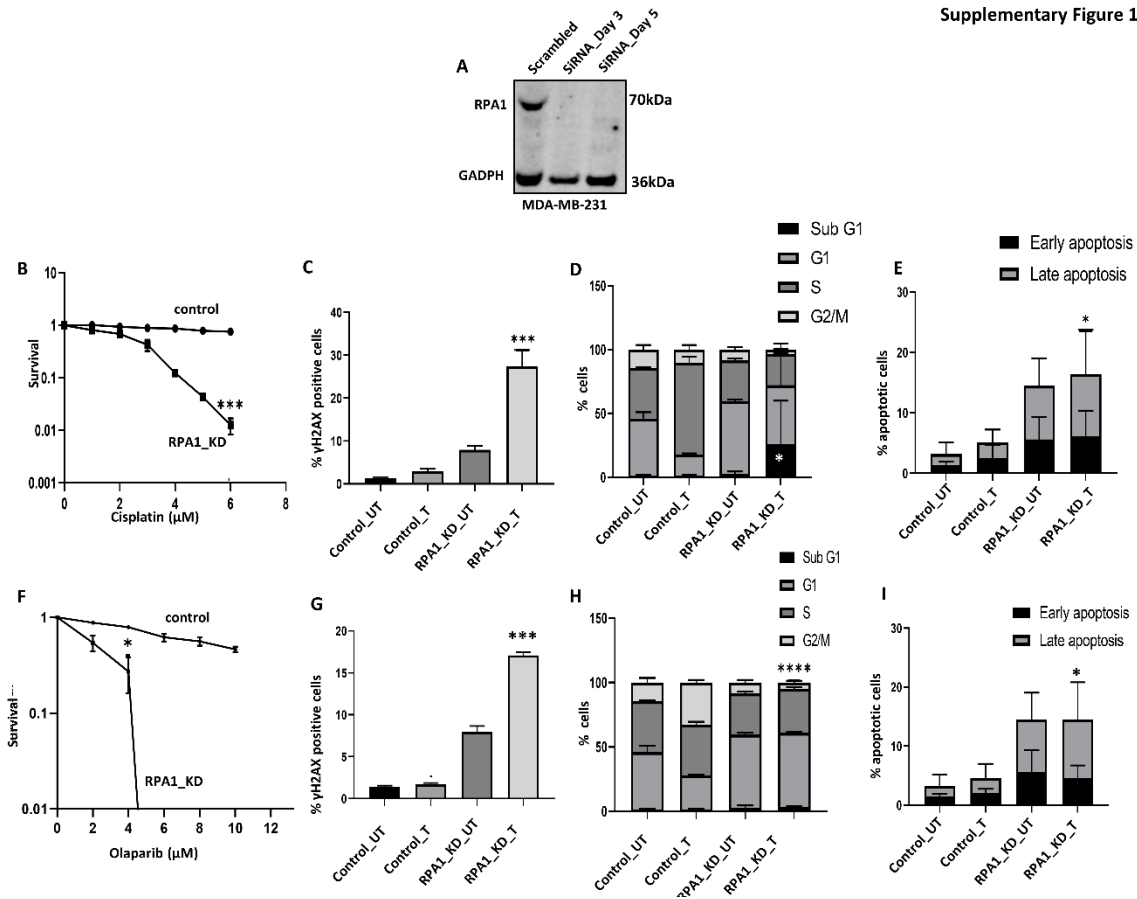

**Supplementary Figure 13: RPA1 depletion and cisplatin and olaparib sensitivity in breast cancer cells.** (A) RPA1 siRNA knock down in MDA-MB-231 cells. Lysates were collected at day3 and day5. (B) Clonogenic survival assay for cisplatin sensitivity in MDA-MB-231 cells control and MCF7\_RPA1\_KD cells. (C) Quantification of  $\gamma\text{H2AX}$  positive cells by flow cytometry. (D) Cell cycle analysis by flow cytometry. (E) AnnexinV analysis for apoptotic cells in MDA-MB-231 control and RPA1\_knock down cells treated with 5  $\mu\text{M}$  cisplatin for 24hrs. (F) Clonogenic survival assay for Olaparib sensitivity in MDA-MB-231 cells control and MDA-MB-231\_RPA1\_KD cells. (G) Quantification of  $\gamma\text{H2AX}$  positive cells by flow cytometry. (H) Cell cycle analysis by flow cytometry. (I) AnnexinV analysis for apoptotic cells in MDA-MB-231 control and RPA1\_knock down cells treated with 6  $\mu\text{M}$  Olaparib for 24 hrs. Statistical analysis was conducted as on GraphPad Prism7 software. To compare between two groups, student- T-tests analysis was performed. One-way ANOVA was performed to compare between more than two groups (variances analyses). Two-way ANOVA was used to analyse

two variables such as Annexin V analysis and cell cycle analysis. All experiments were expressed as means  $\pm$  standard deviation S.D. of three independent experiments. Error bars represent standard error of mean between experiments. UN = untreated, T = treated. '\*' = p value  $<0.05$ , '\*\*' = p value  $<0.001$ , '\*\*\*' = p value  $<0.0001$ .



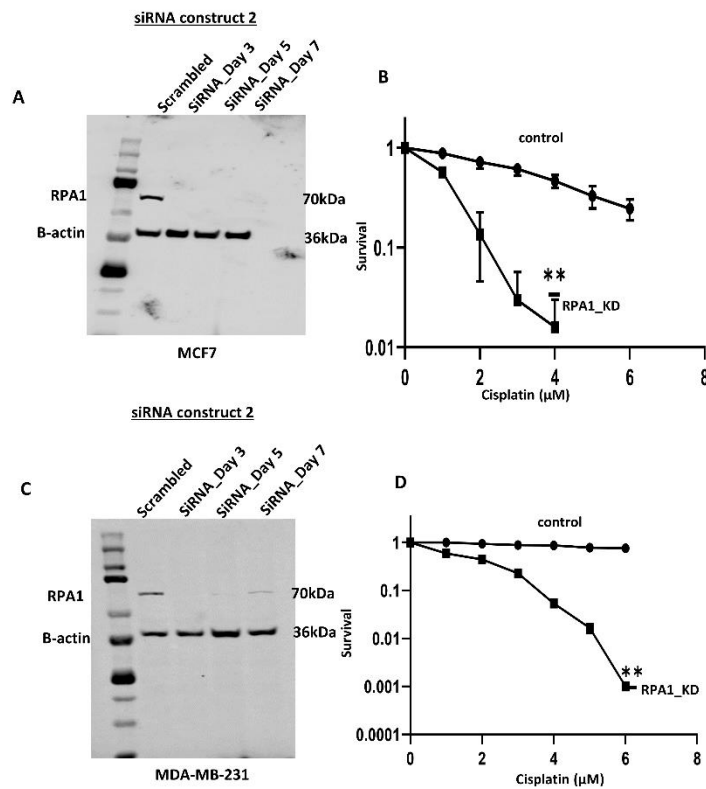

**Supplementary Figure 14: RPA depletion and cisplatin sensitization.** (A). RPA1 siRNA construct 2 knock down in MCF7 cells. Lysates were collected at day3 and day5. (B). Clonogenic survival assay for cisplatin sensitivity in MCF7 cells control and MCF7\_RPA1\_KD cells. (C). RPA1 siRNA construct 2 knock down in MDA-MB-231 cells. Lysates were collected at day3 and day5. (D) Clonogenic survival assay for cisplatin sensitivity in MDA-MB-231 cells control and MCF7\_RPA1\_KD cells. Statistical analysis was conducted as on GraphPad Prism7 software. To compare between two groups, student- T-tests analysis was performed. One-way ANOVA was performed to compare between more than two groups (variances analyses). Two-way ANOVA was used to analyse two variables such as Annexin V analysis and cell cycle analysis. All experiments were expressed as means  $\pm$  standard deviation S.D. of three independent experiments. Error bars represent standard error of mean between experiments. UN = untreated, T = treated. ‘\*’ = p value  $<0.05$ , ‘\*\*’ = p value  $<0.001$ , ‘\*\*\*’ = p value  $<0.0001$ .

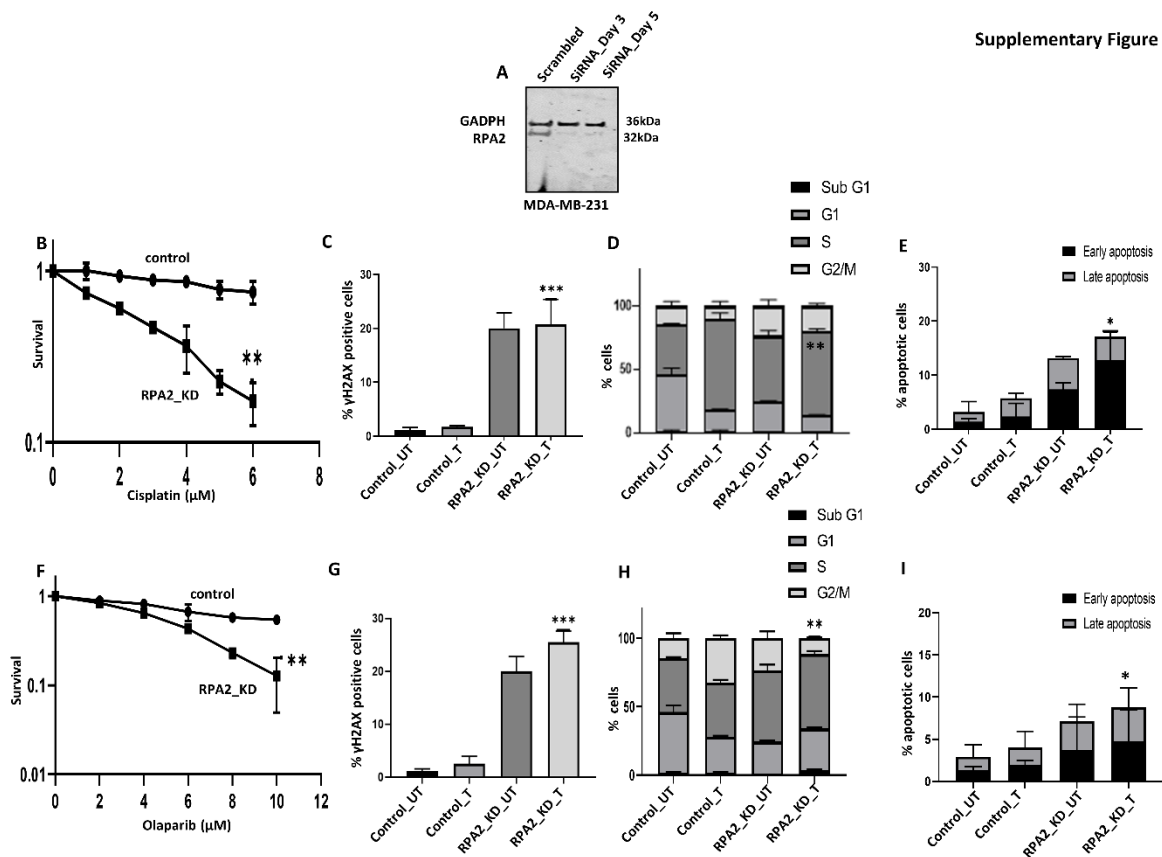

**Supplementary Figure 15: RPA2 depletion and cisplatin and Olaparib sensitivity in breast cancer cells.** (A) RPA2 siRNA knock down in MDA-MB-231 cells. Lysates were collected at day3 and day5. (B) Clonogenic survival assay for cisplatin sensitivity in MDA-MB-231 cells control and MCF7\_RPA2\_KD cells. (C) Quantification of  $\gamma\text{H2AX}$  positive cells by flow cytometry. (D) Cell cycle analysis by flow cytometry. (E) AnnexinV analysis for apoptotic cells in MDA-MB-231 control and RPA2\_knock down cells treated with 5  $\mu\text{M}$  cisplatin for 24hrs. (F) Clonogenic survival assay for Olaparib sensitivity in MDA-MB-231 cells control and MDA-MB-231\_RPA2\_KD cells. (G) Quantification of  $\gamma\text{H2AX}$  positive cells by flow cytometry. (H) Cell cycle analysis by flow cytometry. (I) AnnexinV analysis for apoptotic cells in MDA-MB-231 control and RPA2\_knock down cells treated with 6 $\mu\text{M}$  Olaparib for 24 hrs. Statistical analysis was conducted as on GraphPad Prism7 software. To compare between two groups, student- T-tests analysis was performed. One-way ANOVA was

performed to compare between more than two groups (variances analyses). Two-way ANOVA was used to analyse two variables such as Annexin V analysis and cell cycle analysis. All experiments were expressed as means  $\pm$  standard deviation S.D. of three independent experiments. Error bars represent standard error of mean between experiments. UN = untreated, T = treated. '\*' = p value <0.05, '\*\*' = p value <0.001, '\*\*\*' = p value <0.0001.

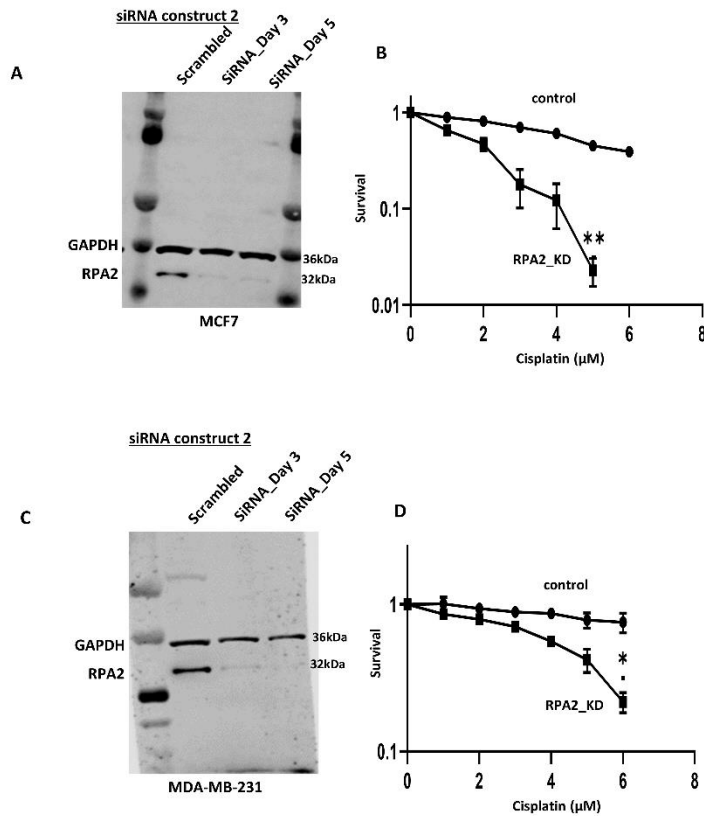

**Supplementary Figure 16: RPA2 depletion and cisplatin sensitization.** (A.) RPA2 siRNA construct 2 knock down in MCF7 cells. Lysates were collected at day3 and day5. (B.) Clonogenic survival assay for cisplatin sensitivity in MCF7 cells control and MCF7\_RPA2\_KD cells. (C.) RPA2 siRNA construct 2 knock down in MDA-MB-231 cells. Lysates were collected at day3 and day5. (D) Clonogenic survival assay for cisplatin sensitivity in MDA-MB-231 cells control and MCF7\_RPA2\_KD cells. Statistical analysis was conducted as on GraphPad Prism7 software. To compare between two groups, student- T-tests analysis was performed. One-way ANOVA was performed to compare between more than two groups (variances analyses). Two-way ANOVA was used to analyse two variables such as Annexin V analysis and cell cycle analysis. All experiments were expressed as means  $\pm$  standard deviation S.D. of three independent experiments. Error bars represent standard error of mean between experiments. UN = untreated, T = treated. ‘\*’ = p value  $<0.05$ , ‘\*\*’ = p value  $<0.001$ , ‘\*\*\*’ = p value  $<0.0001$ .

## **Uncropped gels**

Supplementary Figure 17

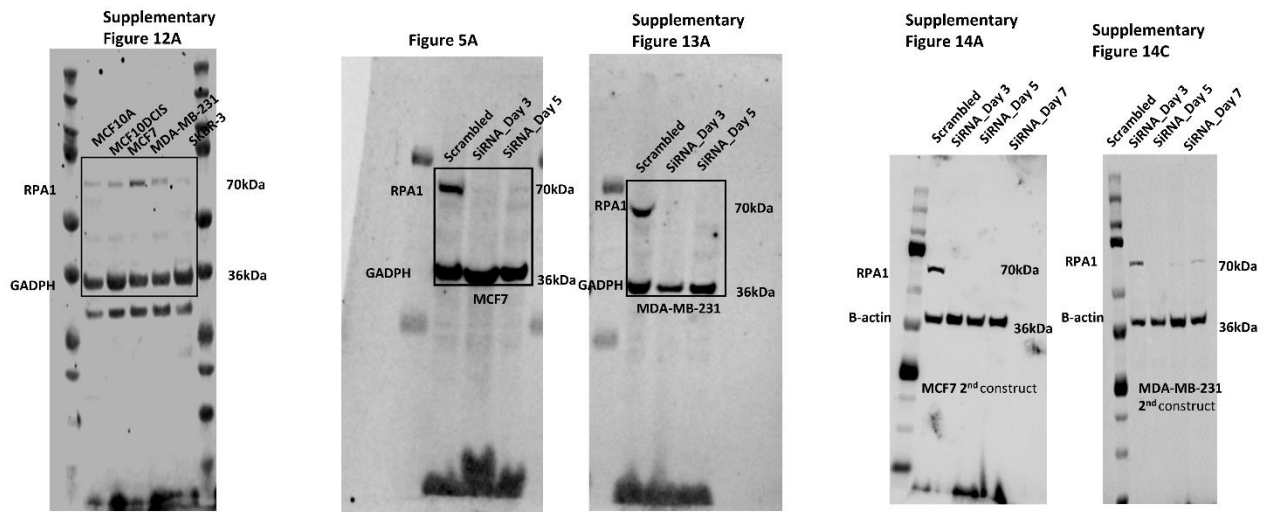

Supplementary Figure 18

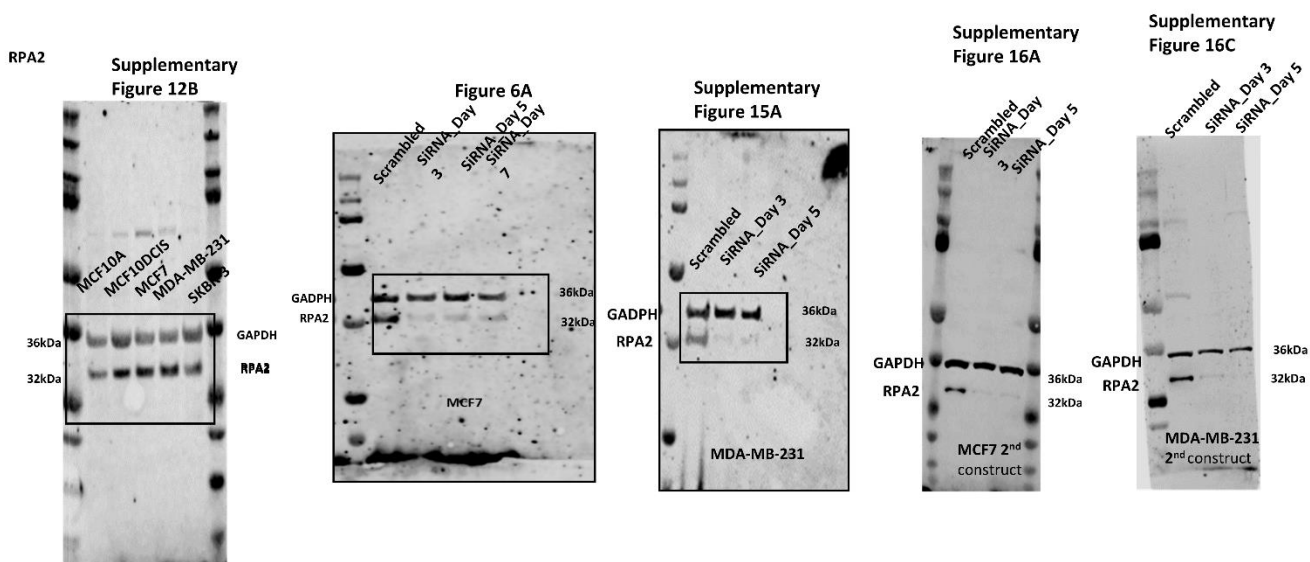

Supplementary  
Figure 12E

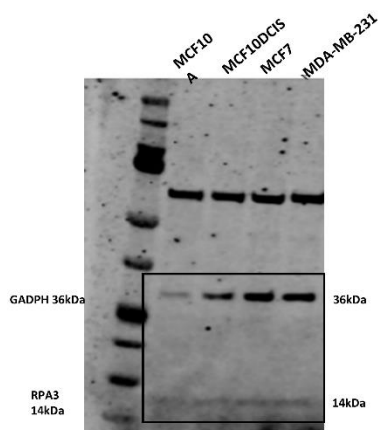

Supplement: 41523_2023_524_MOESM1_ESM.pdf [file 41523_2023_524_MOESM1_ESM.pdf]
